1 **Multimics Interrogation into HBV (Hepatitis B Virus)-Host Interaction Reveals**  
2 **Novel Coding potential in Human Genome, and Identifies Canonical and Non-**  
3 **canonical Proteins as Host Restriction Factors against HBV**

4

5

6 Shilin Yuan<sup>1,2†</sup>, Guanghong Liao<sup>1,2†</sup>, Menghuan Zhang<sup>1,†</sup>, Yuanfei Zhu<sup>3,†</sup>,

7 Weidi Xiao<sup>5†</sup>, Kun Wang<sup>1</sup>, Caiwei Jia<sup>4</sup>, Qiang Deng<sup>3,‡</sup>, Jian Zhang<sup>6,‡</sup>, Ping Xu<sup>5,‡</sup>,

8 Ronggui Hu<sup>1,2,4,‡,\*</sup>

9

10 <sup>1</sup>State Key Laboratory of Molecular Biology, Shanghai Institute of Biochemistry and  
11 Cell Biology, Center for Excellence in Molecular Cell Science, Chinese Academy of  
12 Sciences, Shanghai 200031, China

13 <sup>2</sup>University of Chinese Academy of Sciences, Beijing 100049, China

14 <sup>3</sup>Key Laboratory of Medical Molecular Virology (MOE & MOH), School of Basic  
15 Medical Sciences, Fudan University, Shanghai, China 200032

16 <sup>4</sup>Medical College, Guizhou University, Guiyang, Guizhou, China 550025

17 <sup>5</sup>State Key Laboratory of Proteomics, Beijing Proteome Research Center, National  
18 Center for Protein Sciences (Beijing), Research Unit of Proteomics & Research and  
19 Development of New Drug of Chinese Academy of Medical Sciences, Beijing  
20 Institute of Lifeomics, Beijing 102206, China

21 <sup>6</sup>Key Laboratory of Cell Differentiation and Apoptosis, Medicinal Bioinformatics  
22 Center, Shanghai JiaoTong University School of Medicine, Shanghai, China, 200025.

23 † These authors contributed to this work equally.

24 ‡ These authors contributed to this work equally.

25

26

27 **Contact Information:**

28

\*E-mail: coryhu@sibcb.ac.cn, Telephone: 86-17717541320, Fax: 86-21-54921409

28

## 29 **Abstract**

30 Hepatitis B Virus constitutes a major threat to global public health. Current  
31 understanding of HBV-host interaction is yet limited. Here, ribosome profiling,  
32 quantitative mass spectrometry and RNA-sequencing are conducted on a recently  
33 established HBV replication system. We have identified multiomic DEGs  
34 (differentially expressed genes) that HBV orchestrated to remodel host proteostasis  
35 networks. Our multiomics interrogation revealed that HBV induced significant  
36 changes in both transcription and translation of 35 canonical genes including  
37 PPP1R15A, PGAM5 and SIRT6, as well as the expression of at least 15 non-  
38 canonical ORFs including ncPON2 and ncGRWD1, thus revealing an extra coding  
39 potential of human genome. Overexpression of these five genes but not the  
40 enzymatically deficient SIRT6 mutants suppressed HBV replication while knockdown  
41 SIRT6 had opposite effect. Furthermore, the expression of *SIRT6* was down-regulated  
42 in patients, cells or animal models of HBV infection. Mechanistic study further  
43 indicated that SIRT6 directly binds to mini-chromosome and deacetylates histone H3  
44 lysine 9 (H3K9ac) and histone H3 lysine 56 (H3K56ac), and chemical activation of  
45 endogenous SIRT6 with MDL800 suppressed HBV infection *in vitro* and *in vivo*. By  
46 generating the first multiomics landscape of host-HBV interaction, our work is thus  
47 opening a new avenue to facilitate therapeutic development against HBV infection.

48

49 *Keywords:* Ribosome profiling; non-canonical ORF; SIRT6; Mini-chromosome;  
50 Histone deacetylation.

51

52

53 *Running Title:* Multiomics Interrogation into HBV (Hepatitis B Virus)-Host  
54 Interaction

## 55 **Introduction**

56 Hepatitis B virus currently infects over 257 million humans worldwide, and chronic  
57 HBV infection is the most prominent risk factor for hepatocellular carcinoma (HCC),  
58 causing more than 887,000 deaths per year<sup>1,2</sup>. HBV infection thus constitutes a major  
59 global public health threat with yet no complete curing treatment. The compact HBV  
60 genome encodes virus DNA polymerase, an X protein (HBx) and virus antigens  
61 (HBcAg, HBeAg and HBsAg, respectively). Covalently closed circular DNA  
62 (cccDNA) in the form of virus mini-chromosome is central in HBV life-cycle, as it  
63 not only shelters the virus from the attack by host pattern recognition factors but also  
64 serves as transcriptional template for viral gene expression<sup>3-6</sup>. Targeting HBV  
65 cccDNA reservoir and persistently silencing cccDNA-based transcription are  
66 considered essential strategies that should be prioritized to develop HBV curing  
67 treatment<sup>7,8</sup>. Current therapies for chronic HBV infection are restricted to type I  
68 interferon treatment or nucleos(t)ide analogues (NAs), which target the viral reverse  
69 transcriptase. However, interferon therapy has strong side effect, and its efficiency is  
70 also limited<sup>9</sup>; while NAs are better tolerated and potent against viremia, it cannot lead  
71 to functional cure, that is, the clearance of HBsAg<sup>9</sup>. Currently, Studies of HBV-host  
72 interaction from the perspective of multi-omics is lacking<sup>10-13</sup>. A comprehensive  
73 delineation of the host networks impacted by HBV would advance our current  
74 understanding of HBV infection. State-of-art -omics approaches are thus called upon  
75 to systematically elucidate the molecular details in HBV-host interaction<sup>1</sup>.

76  
77 Ribosome profiling (RiboSeq) is a technique that could determine the sub-population  
78 of mRNAs that are actively translated<sup>14</sup>. Application of RiboSeq has enabled  
79 mapping of ribosome footprints on RNAs at nucleotide resolution<sup>15</sup>. The use of  
80 harringtonine to arrest ribosomes at the translation initiation site has made it possible  
81 to discover novel translational events, including non-canonical open reading frames  
82 (ncORFs)<sup>16</sup>. Through the combination of RiboSeq and quantitative proteomic

83 technology such as SILAC (Stable Isotope Labeling by/with Amino acids in Cell  
84 culture)<sup>17</sup>, one could digitally assess the abundance of individual proteins under  
85 different conditions, and confirm the existence of the translational products of  
86 ncORFs. It is interesting to ask how HBV would impact on translation of these  
87 ncORFs and whether and what effects the changed translation of the ncORFs might  
88 have on HBV replication or virus gene expression.

89

90 Sirtuins family proteins (SIRT6) possess the activity of either mono-ADP-  
91 ribosyltransferase or deacylases including deacetylase, desuccinylase, demalonylase,  
92 demyristoylase and depalmitoylase<sup>18</sup>. With SIRT6 as a prominent example, the  
93 Sirtuin family members have distinct subcellular localization and are known to  
94 regulate aging, mitosis, transcription, apoptosis, inflammation, stress responses and  
95 metabolism<sup>19</sup>. Previously, SIRT6 have been found to associate with HBV replication  
96 with sometimes contradicting reports: Deng and colleagues showed all SIRT6  
97 activated HBV gene expression<sup>20</sup>, while Ren et al reported overexpression of SIRT6  
98 mediated transcriptional suppression of the virus genes through epigenetic regulation  
99 of HBV cccDNA<sup>21</sup>. One of the remaining questions with the latter study was whether  
100 mitochondria-localized SIRT6 might suppress HBV gene transcription only when  
101 introduced exogenously. It also remains unclear whether activation of endogenous  
102 SIRT6 could have any effect on HBV DNA replication or virus gene transcription.

103

104 In this work, we profiled HBV-induced changes in ncORFs of host cells, using  
105 RiboSeq and SILAC, as well as differentially expressed genes (DEGs) using  
106 conventional RNA-sequencing. We found that HBV DNA replication and/or virus  
107 gene expression could be significantly altered when PGAM5, PPP1R15A or SIRT6  
108 was ectopically expressed or the translational product of ncPON2 was introduced as  
109 well as ncGRWD1. Particularly, we found SIRT6, which has transcription corepressor  
110 activity concerning gene silencing, was transcriptionally and translationally down-

111 regulated by HBV, and MDL800, a small molecular agonist of SIRT6<sup>22</sup>, was shown to  
112 potently suppress HBV gene expression in both well-established cell<sup>23,24</sup> and mouse  
113 models<sup>25</sup> for HBV infection.

114

## 115 **Results**

### 116 **The experimental systems for HBV DNA replication and gene expression**

117 To achieve robust viral replication, two cell-based HBV replication systems were  
118 employed: 1) Huh7.5.1 or HepG2 cells co-transfected with pCMV-Cre and prcccDNA  
119 to generate HBV cccDNAs in the cells (HBV<sup>+</sup>) (**Fig. S1A**), while the control cells  
120 (HBV<sup>-</sup>) were transfected with pCMV-Cre and pCDNA3.1 vector<sup>23</sup>; 2) HepG2-  
121 derived HepAD38 cells that harbors tetracycline-controlled HBV transgene by  
122 chromosomal integration<sup>26</sup>. Expression of viral antigens was then examined at  
123 indicated time points (**Fig. S1B-D**). Specifically, the expression of HBsAg and  
124 HBeAg were found to reach plateau approximately at 72 h.p.t in the transient  
125 transfection system (**Fig. S1B-S1C**) and after 6 days in the Tet-inducible HBV  
126 expression system (**Fig. S1D**). Samples were thus collected at these time points, and  
127 subjected to RNA-seq, RiboSeq and other analyses.

128

### 129 **Ribosome profiling reveals the translation of 20,533 non-canonical ORFs** 130 **(ncORFs), some of which was markedly altered by HBV**

131 RiboSeq (ribosome profiling) was performed with Huh7.5.1 cells that were either  
132 HBV<sup>+</sup> or HBV<sup>-</sup>, and ribosome footprints were mapped to the mRNAs of 6,030 genes  
133 (**Supplementary file S1**). On average, ribosomes were found to occupy mRNA  
134 fragments with lengths peaking at 30-nucleotide width as typically reported before  
135 (**Fig. S2A**). Further quality control assays indicated that these data were highly  
136 reproducible among all three biological replicates in RiboSeq (**Fig. S2B**).

137

138 With the development of ribosome profiling, many non-canonical open reading  
139 frames (ncORFs) have been discovered. Translation of these ncORFs often produces  
140 functional or non-functional micro-peptides<sup>27,28</sup>. To identify novel translational events  
141 in the presence or absence of HBV, an analysis pipeline combined with RiboCode<sup>29</sup>  
142 was built to genome-widely annotate translated ORFs computationally, which defined  
143 the ORFs most likely being actively translated based on our RiboSeq data (**Fig. 1A**).

144

145 A total of 57,919 translated ORFs (including ORFs of isoform) were identified using  
146 RiboCode in our RiboSeq datasets in HBV<sup>+</sup> and HBV<sup>-</sup> groups (**Supplementary file**  
147 **S2**). Among them, 37,386 were perfectly matched to annotated ORFs<sup>29</sup>. The  
148 remaining newly identified 20,533 ORFs could be further divided into 6 types (**Fig.**  
149 **1B**, see materials and methods for more details). These ncORFs were found to encode  
150 peptides or proteins of overall lengths markedly shorter than those of the previously  
151 annotated canonical ORFs, with over 30% (6,466 out of 20,533) of all translational  
152 products less than 100 amino acids in length (**Fig. 1C**).

153

154 To further assess the effect of HBV on the translation of host mRNA, we also adopted  
155 SILAC<sup>30</sup> and Maxquant<sup>31</sup> to detect and quantitate the relative abundances of the  
156 products translated from the ncORFs identified above (**Fig. 1A, Fig. S3A**) in  
157 HepAD38 cells that had HBV genome integrated in their chromosomes and started to  
158 express HBV genes upon the tetracycline withdrawal. After excluding translational  
159 products from the in-frame ncORFs that were practically indistinguishable from those  
160 of the canonical ORFs, 47 novel peptides were identified and quantified with  
161 MaxQuant<sup>31</sup> against customized sequence database based on RiboCode, with the  
162 abundances of many peptides seemed to be altered in host cells upon HBV loading  
163 (**Supplementary file S3**). Among them, we sorted 15 novel peptides by the most  
164 confident mass spectra result (**Fig.S3B-N**), and their expression seemed to be  
165 significantly perturbed by HBV (**Fig.1D**). There seemed to exist a positive correlation

166 in relative abundance between the translational products of some of the ncORFs and  
167 their cognate canonical ORFs, e.g. *PON2*, *WDR48* and *VAPB* (**Fig.S4A**,  
168 **Supplementary file S10**).

169

170 **ncPON2 and ncGRWD1 suppress HBV gene expression.**

171 both ncORFs related to *GRWD1* and *PON2* genes and their corresponding  
172 translational products were successfully detected in RiboSeq and SILAC analyses,  
173 respectively (**Fig. 1E-H**). Replication and expression of HBV in hepAD38 cells were  
174 found to increase the expression of a novel translational product started by an internal  
175 ATG with +1 frame-shift from canonical *GRWD1* ORF, which we termed as  
176 ncGRWD1(**Fig.1E-F**). GRWD1(Glutamate-rich WD repeat-containing protein 1) was  
177 recently identified as a histone binding protein<sup>32</sup>. Through interaction with DDB1,  
178 GRWD1 can be recruited to Cul4B E3 ubiquitin ligase<sup>33,34</sup>. Interestingly, ectopic  
179 expression of ncGRWD1 could suppress the expression of HBc, HBsAg and HBeAg  
180 in HBV<sup>+</sup> cells (**Fig. 1I**).

181 Notably, among all the novel peptides, a peptide related to the ORF of *PON2* was  
182 most significantly down-regulated, and the corresponding translational products was  
183 successfully detected by both RiboSeq and SILAC in all three biological replicates,  
184 respectively (**Fig. 1D, Fig. S4B**). With HepAD38 (Tet<sup>+</sup>) as the control group that did  
185 not express HBV genes except HBs, it was found that the stable replication and  
186 expression of HBV genes in HepAD38 cells upon tetracycline withdrawal (Tet<sup>-</sup>)  
187 resulted in approximately 40% decrease in the expression of a ncORF in *PON2* gene.  
188 This ORF seemed to use an upstream ATG, thus conferring an N-terminal extension  
189 to the canonical PON2 protein, which we termed as ncPON2 (**Fig. 1G-H, Fig. S4B**).  
190 *PON2* belongs to the paraoxonase gene family, which may act as an antioxidant in  
191 cells<sup>35</sup>. Interestingly, ectopic expression of *ncPON2* suppressed the expression of  
192 HBcAg, HBsAg and HBeAg in HBV<sup>+</sup> cells (**Fig. 1J**).

193 To take a glimpse into the mechanisms of these two HBV suppressive ncORFs, co-  
194 immunoprecipitation coupled with mass spectrometry analysis was performed with  
195 ncGRWD1-FLAG and ncPON2-FLAG, with pCDNA3.0-FLAG as a negative control.  
196 And GO and pathway enrichment analysis was performed using a web server  
197 Metascape (<http://metascape.org/>) with the identified deemed interactors of  
198 ncGRWD1 or ncPON2 (**Supplementary file S4**). The results show that ncGRWD1  
199 could bind to the host machinery participating in metabolism of RNA, translation,  
200 RNA splicing and regulation of gene silencing (**Fig. S4C**); while the host proteins  
201 interact with ncPON2 was involved in metabolism of RNA, rRNA processing in the  
202 nucleus and cytosol, metabolism of lipids and HIV infection (**Fig. S4D**).

203 Taken together, HBV appeared to alter the translation of some ncORFs including  
204 *ncGRWD1* and *ncPON2*, whose translational product could suppress viral gene  
205 expression probably through affecting multiple pathways including metabolism of  
206 RNA.

207

## 208 **HBV globally impacts on the transcriptional and translational landscapes in host** 209 **cells**

210 To globally profile the differentially expressed genes (DEGs) in response to HBV,  
211 RNA sequencing and ribosome profiling were performed with HBV<sup>+</sup> Huh7.5.1 cells  
212 or the HBV<sup>-</sup> control cells in parallel (**Fig.2A**). RNA-seq analysis detected the  
213 transcripts from 12,547 genes (**Supplementary file S5**), ribosome footprints were  
214 mapped to mRNAs of 6,030 genes (**Supplementary file S1**). Across deep-sequencing  
215 replicates, our in vivo RNA-seq (**Fig.S5A**) and ribosomal profiling was highly  
216 reproducible (**Fig. S2B**).

217 In general, 324 and 39 genes were significantly up regulated; and 226 and 939 genes  
218 were significantly down regulated by HBV in RNA-seq and ribosome profiling,  
219 respectively (**Fig.S5B, Supplementary file S6 and S7**). KEGG pathway enrichment  
220 analysis identified over-representation of genes for protein processing in endoplasmic



221 reticulum, spliceosome, bacterial invasion of epithelial cells, cysteine and methionine  
222 metabolism in the transcriptome-related differential expressed genes (DEGs) (**Figure**  
223 **S5C**); Meanwhile, over-representation of TGF-beta signaling pathway, cellular  
224 senescence, adherens junction, N-Glycan biosynthesis, Hippo signaling pathway was  
225 identified in the translome-related DEGs (**Figure S5D**).

226 To further explore whether HBV impacted on host mRNA translation, we calculated  
227 translational efficiency by determining the reads per kilobase of transcript per million  
228 mapped reads (RPKM) of coding sequences (CDS) in ribosome profiling versus the  
229 RPKM in exons of RNA-seq ( $\text{RPKM}_{\text{ribosome profiling}}/\text{RPKM}_{\text{RNA-seq}}$ ) in HBV and non-  
230 HBV states. The overall translational efficiency of host mRNAs in HBV-transfected  
231 cells was lower than in control (**Fig. 2B, Supplementary file S8**), indicating that  
232 HBV caused a major shutoff in translation of host genes, a phenomenon also  
233 commonly observed with many other viruses<sup>36,37</sup>.

234

235 **HBV induces significant changes in both transcription and translation of 35 host**  
236 **genes including *PPP1R15A* and *PGAM5*.**

237 HBV significantly modulated both the transcription and translation of 35 differentially  
238 expressed genes (DEGs) (**Fig.2C**). Gene ontology analysis indicated that over half of  
239 these 35 DEGs were involved in either biosynthetic or metabolic processes (**Fig.2D**).

240 Among them, many genes such as *SIRT6*, *HMGB1*, *MAP2K2*, *CRY1* and *PER2* were  
241 key regulatory factors or functional components in multiple biological processes,  
242 including cellular biosynthetic process, protein metabolic process, negative regulation  
243 of metabolic process, circadian clock, and negative regulation of biosynthetic process  
244 and transport. NPLOC4, RPS17 and PPP1R15A, however, were of known roles in  
245 regulating translation (**Fig.2D**). These DEGs were thus serving as the crucially  
246 important nodes of multiple metabolic and signaling pathways, which may be  
247 disturbed by HBV.

248 We then went on to check whether HBV-induced changes in the expression of some  
249 of the 35 DEGs might reciprocally affect HBV itself. We screened 7 of them and  
250 found only PGAM5 and PPP1R15A which could potently suppress all major HBV  
251 antigens expression in HBV recombinant cccDNA genome (**Fig.S6A-B**). As one of  
252 the DEGs whose expression was downregulated by HBV (**Fig.2C, Fig.2E**), PGAM  
253 family member 5 (PGAM5) is a mitochondrial Serine/threonine-protein phosphatase  
254 that not only regulates the dynamics of mitochondria and the process of mitophagy  
255 but also is a central mediator for programmed necrosis induced by TNF or reactive  
256 oxygen species<sup>38</sup>. Previously, PGAM5 deficiency was shown to protect acute liver  
257 injury driven by programmed necrosis<sup>39</sup>. The re-introduction of PGAM5 potently  
258 inhibited the expression of HBc, HBs and HBe (**Fig.2F-G**). HBV-induced down-  
259 regulation in PGAM5 expression may impact not only the dynamics and turnover of  
260 host mitochondria but also suppress the inflammation-induced necrosis and the tissue  
261 injury that could activate the host immune response.

262 PPP1R15A (Protein phosphatase 1 regulatory subunit 15A) could facilitate the  
263 recovery and survival of cells from stress. While the expression of  
264 PPP1R15A/GADD34 was up-regulated by HBV (**Fig.2C, Fig.2E**), re-introduction of  
265 PPP1R15A was found to significantly inhibit the expression of all three HBV antigens  
266 (**Fig.2F-G**).

267 To further dissect the mechanism of the suppressive effect of PPP1R15A and PGAM5  
268 on HBV, co-immunoprecipitation coupled with mass spectrometry analysis was  
269 performed with empty vector as a negative control to identify deemed interactions  
270 between host proteins and PPP1R15A or PGAM5 (**Supplementary file S9**). The  
271 results shown that the host interaction proteins of PPP1R15A could participate in  
272 processes including metabolism of RNA, cellular response to stress, modulation by  
273 host of viral genome replication and regulation of translation (**Fig. S6C**); while  
274 PGAM5 could bind to host proteins involving metabolism of RNA, translation,  
275 mitotic cell cycle and mitochondrion organization (**Fig. S6D**). Additionally, to found

276 viral target interact with PGAM5, we performed co-immunoprecipitation between  
277 PGAM5 and two proteins which were essential for virus replication, HBc and HBx.  
278 We found PGAM5 could bind to both of them, suggesting a possible perturbation of  
279 PGAM5 on HBV genome replication (**Fig. S6E**).

280 These data suggested that HBV infection and expression could impact on the  
281 proteostasis of many genes with meaningful functions and consequences on host-  
282 HBV interaction. Additionally, these observations have also testified the strength and  
283 power of dissecting host-HBV interaction using a multi-omics approach.

284

### 285 **HBV induced transcriptomic changes in host cells**

286 To dissect host responses to HBV at transcription level, we further analyzed our  
287 RNA-seq data. To find potential host restriction factors of HBV cccDNA transcription,  
288 we performed gene ontology analysis and focused on GO term “transcription”, the  
289 heatmap of these genes was shown (**Fig. S7A-B**). An enriched GO term,  
290 “transcription corepressor activity”, caught our attention. The heatmap of 11 DEGs  
291 enriched in transcription corepressor activity was shown, and 2 genes, *SRSF2* and  
292 *SIRT6* were down-regulated by HBV (**Fig. 3A**). *SRSF2* (serine and arginine rich  
293 splicing factor 2) is a component of spliceosome and responsible for pre-mRNA  
294 splicing and mRNA export from nucleus<sup>40</sup>. *SIRT6* (Sirtuin 6) exhibits histone  
295 deacetylase activities that may participate in gene silencing<sup>41</sup>.

296

### 297 **Deacylase Sirt6 is down-regulated in patients tested positive of HBV antigens, or** 298 **the cell and mouse models for HBV replication.**

299 *SIRT6* was previously established as an important regulator in controlling cellular  
300 response to stress, cellular component organization, carbohydrate metabolism and  
301 gene silencing, with histone H3 as its major targets<sup>42,43</sup>. The transcription of  
302 endogenous *SIRT6* was significantly down-regulated by HBV as revealed by qRT-  
303 PCR analysis (**Fig. 3B**). To further characterize how HBV might also impact on

304 SIRT6-related networks, we particularly looked into the transcriptional profiles of  
305 both the known upstream regulators and the downstream effectors of SIRT6<sup>44-46</sup> (**Fig.**  
306 **3C**). As shown in **Fig. 3C**, HBV down-regulated the transcription of *STUB1*, also  
307 known as CHIP, which prevents SIRT6 degradation through non-canonical  
308 ubiquitination<sup>47</sup>; while up-regulating the transcription of many genes involved in  
309 glucose or lipid metabolism such as *LRP1*, *PFKM* and *LDHA*, and that of ribosome  
310 protein genes such as *RPL6*. Notably, the transcription of *MYC* was also up-regulated  
311 in HBV-loaded cells<sup>48</sup>, which may also reflect the perturbation of SIRT6-related gene  
312 network. Some of the differences were further confirmed by qPCR analyses (**Fig. 3D**).  
313 Taken together, these results strongly suggested that SIRT6 could constitute a critical  
314 node mediating HBV-induced remodeling of host gene networks.

315

316 Consistent with RNA-seq results, the translation initiation of *SIRT6* was also  
317 compromised by HBV in RiboSeq (**Fig. 3E**). Immunoblotting analysis revealed that  
318 HBV did down-regulate the static level of endogenous SIRT6 protein in Huh7.5.1  
319 cells (**Fig. 3F**), HepAD38 cells (**Fig. S7C**), or HepG2-NTCP cells for HBV infection  
320 (**Fig. 3G**). Moreover, in a recently developed mouse model for HBV persistence<sup>25</sup>, the  
321 level of endogenous SIRT6 protein was reduced in the HBV-infected (HBV<sup>+</sup>) mouse  
322 liver (**Fig. 3H, S7D**). To further examine the correlation between HBV and SIRT6 *in*  
323 *vivo*, total proteins were extracted from liver tissue samples of patients diagnosed with  
324 HBV positive or negative, respectively (detailed patient information was in **table S1**).  
325 Indeed, the level of endogenous SIRT6 protein in these patients was negatively  
326 correlated to their serum HBsAg level (**Fig. 3I, 3J**). Altogether, these data clearly  
327 indicated that HBV could target and down-regulate host SIRT6 *in vitro* and *in vivo*.

328

329 **Restoration of the homeostatic level of SIRT6 potently suppresses HBV gene**  
330 **expression**

331 Subsequently, exogenous SIRT6, along with other members of the sirtuin family, was  
332 introduced into HBV<sup>+</sup> Huh7.5.1 cells to test their potential effect on HBV gene  
333 expression, only SIRT6 strongly suppressed HBV gene expression (**Fig. S8A** and  
334 **S8B**).

335

336 Introduction of SIRT6-FLAG did markedly suppress HBcAg, HBsAg and HBeAg  
337 expression in multiple cell models for HBV infection and gene expression (**Fig. 4A-B**,  
338 **S8C, S8D**). Additionally, ectopic expression of SIRT6 also suppressed HBV gene  
339 expression in the context of both 1.1mer- and 1.3mer- HBV linear genome (**Fig.S8E-**  
340 **F**), while knockdown of endogenous SIRT6 with siRNA or shRNA elevated all HBV  
341 major antigens expression in HBV<sup>+</sup> Huh7.5.1 and HepAD38 cells (**Fig.4C-D, S8G-H**),  
342 respectively. Furthermore, the deacetylation activity of SIRT6 seemed to be essential  
343 for its restrictive effect on HBV, as its HBV-suppressing effect was largely abolished  
344 by the point mutation S56Y, G60A, R65A or H133Y that disrupted the deacetylation  
345 activity of SIRT6<sup>49</sup> (**Fig. 4E-F**), Southern blotting analysis confirmed that SIRT6  
346 could suppress HBV genome replication in both HepG2 (**Fig.4G**) and Huh7 cells  
347 (**Fig.S8I**), while SIRT6 containing mutation S56Y only had marginal effect (**Fig.4G**).  
348 Therefore, endogenous SIRT6 was emerging as a novel host virus restriction factor  
349 (Vrf) and restoration of SIRT6 homeostasis could potentially suppress HBV gene  
350 expression and genome replication.

351 Recently, MDL800 was developed as a specific allosteric activator for human  
352 SIRT6<sup>22</sup> (**Fig.4H**). In HBV mini-chromosome, H3K56ac is an epigenetic marker for  
353 active transcription of HBV cccDNA<sup>3</sup>, whose acetylation status is dynamically  
354 controlled by histone acetyl transferase CBP/p300<sup>50</sup> and deacetylase SIRT6<sup>43</sup>. In  
355 HepAD38 cells (**Fig.4I-J**), HBV<sup>+</sup> Huh7.5.1 (**Fig. S9A , S9B**) or HepG2 (**Fig. S9C**,  
356 **S9D**) cells, the levels of HBcAg, HBsAg and HBeAg, as well as H3K56ac were  
357 decreased upon MDL800 treatment in a dose-dependent manner. Moreover, the  
358 suppressive effect of MDL800 on HBV gene expression was largely abolished when

359 knocking down the endogenous SIRT6 in HepG2 cells (**Fig. S9E**). Furthermore,  
360 Southern blotting analyses clearly indicated that MDL800 treatment also potently  
361 suppressed HBV genome replication (**Fig. 4K**). These data suggesting that SIRT6  
362 could suppress HBV gene expression and genome replication via de-acetylating  
363 H3K56ac, regardless of host cell types.

364

### 365 **SIRT6 suppresses rcccDNA transcription involving interacting with HBcAg and** 366 **direct deacetylating of histone H3 in HBV mini-chromosome**

367 To test which proteins in sirtuins family could interact with HBc, co-IP assay was  
368 performed and the result shown that only SIRT6 could strongly bind to HBc, and  
369 SIRT7 has a weak interaction with HBc, while others couldn't (**Fig. S10A**). To further  
370 investigate how SIRT6 mediated HBV restriction, co-IP assay was performed  
371 between SIRT6 family and HBcAg mutually (**Fig. 5A**). HBcAg, but not HBx, was  
372 found to interact with SIRT6 involving the core domain (**Fig.S10B-C**).  
373 Immunofluorescence assay further confirmed that SIRT6 and HBcAg indeed co-  
374 localized within speckles in nucleus during HBV replication (**Fig. 5B**). ChIP assay  
375 with SIRT6 antibody indicated that endogenous SIRT6 could directly bind to mini-  
376 chromosome during HBV replication with LINE1 as a positive control<sup>51</sup> (**Fig. 5C**).  
377 HBcAg protein is known to be important for formation and maintenance of HBV  
378 mini-chromosome, promoting the epigenetic permissive state for HBV *in vivo*<sup>3,52,53</sup>.  
379 The interaction between HBcAg and SIRT6 might help recruit SIRT6 to HBV mini-  
380 chromosome and deacetylate the histones for transcriptional repression. Another  
381 ChIP-qPCR assay using H3K56ac (acetylation on histone H3 lysine 56) or H3K9ac  
382 (acetylation on histone H3 lysine 9) antibodies revealed that overexpression of SIRT6  
383 alone was sufficient to deacetylate histone H3 on HBV mini-chromosome (**Fig. 5D**),  
384 and such effect could be reversed when endogenous SIRT6 was knocked-down (**Fig.**  
385 **5E**). Moreover, MDL800 treatment alone was sufficient to deacetylate histone  
386 H3K56ac on HBV mini-chromosome (**Fig. 5F**). Therefore, SIRT6 appeared to

387 suppress HBV gene expression through epigenetically silencing the virus mini-  
388 chromosome.

389

390 **MDL800 suppresses HBV gene expression *in vitro* and *in vivo*.**

391

392 To further access the effect of endogenous SIRT6 on HBV infection and virus gene  
393 expression in *de novo* cell infection and animal system. MDL800 was tested in  
394 HepG2-NTCP cells<sup>24</sup> and a recently established mouse model of HBV through tail-  
395 vein hydrodynamic injection (HDI)<sup>25</sup>, respectively. Firstly, MDL800 potently  
396 suppressed HBe and HBs expression in *de novo* infection in HepG2-NTCP cells at  
397 varying time points (**Fig. 6A-B**). A group of mice were subjected to intraperitoneal  
398 injection with vehicle only or MDL800 continuously for two weeks after intravenous  
399 injection of rcccDNA system of HBV (see methods section). As shown in **Fig.6C**,  
400 continuous administration of MDL800 did lead to significant reduction in serum  
401 levels of HBsAg at different time points, without elevating serum ALT (alanine  
402 aminotransferase) activities (**Fig.6D**) or causing obvious morphological damage in the  
403 liver tissues (**Fig. 6E**). Immuno-histochemical staining demonstrated that MDL800  
404 did lower HBcAg expression and the level of H3K56 acetylation in mouse  
405 hepatocytes (**Fig. 6E-F**). Taken together, these results demonstrated that MDL800  
406 could suppress HBV gene expression by specifically augmenting the de-acetylase  
407 activity of SIRT6. MDL800 thus appeared to be a promising lead compound for  
408 future HBV treatment, through both lowering HBV DNA loads and silencing virus  
409 gene expression.

410

## 411 **Discussion**

412 HBV represents a yet unresolved global threat to public health, and a leading cause of  
413 mortality worldwide. Despite the luminating goal by WHO's worldwide campaign to  
414 eliminate HBV infection from the top list of health threat in 2030, complete curing

415 treatment is still unavailable and more “functional treatment” yet to be developed,  
416 mostly due to our limited understanding of HBV-host interaction and HBV life cycle  
417 <sup>1,5</sup>. Application of the state-of-art -omics techniques were thus called upon to fully  
418 elucidate the mechanism of cccDNA transcription and identify novel targets that  
419 would prove critical for reaching a functional cure<sup>1,54</sup>. To this end, we have applied  
420 RiboSeq, SILAC and RNA-seq, techniques to globally interrogate HBV-host  
421 interaction.

422

423 A total of 20,533 non-canonical ORFs were identified by ribosome profiling (**Fig. 1B**),  
424 which generally encoded proteins or polypeptides shorter than those encoded by the  
425 canonical ORFs (cORFs) (**Fig. 1C**). As a significant portion of the ncORFs  
426 overlapped with many annotated ORFs that encoded proteins of known functions, it  
427 was convenient to speculate that altered translation of these ncORFs might affect  
428 translation of the concerned cORFs, and very likely change the homeostasis and  
429 functionality of the canonical proteins. Particularly, the production of *ncPON2* was  
430 down-regulated by HBV, and ectopic expression of ncPON2 suppressed viral gene  
431 expression (**Fig. 1D** and **1J**), this phenomenon suggested that ncPON2 was a novel  
432 viral restriction factor of HBV. As little was known about the functions of the  
433 translational products of these novel ncORFs, our work combining RiboSeq and  
434 SILAC has offered an opportunity to investigate the roles and dynamics of the  
435 translational products of ncORFs during HBV-host interaction. On the other hand, our  
436 findings also revealed a previously unknown effect of HBV infection on the  
437 translational plasticity of host genome.

438

439 There has been much advance in generating renewable sources of hepatocyte-like  
440 cells from primary hepatocytes<sup>55</sup>. Currently, heterogeneity as well as the low  
441 transfection and/or infection efficiency of the newly transformed cells has limited  
442 their application as stable models for HBV infection<sup>13</sup>. Therefore, several classic cell-



443 based models for HBV study were employed in this work for screening host  
444 restriction factors and primarily confirming the findings, namely Huh7.5.1, Huh7,  
445 HepG2 and HepAD38, mainly due to their extraordinary reproducibility and  
446 robustness for supporting hepatitis B virus replication and gene expression<sup>56-58</sup>. RNA-  
447 seq analysis revealed that HBV altered the transcription of 533 previously annotated  
448 host genes, which defined the set of HBV-specific transcriptional differentially  
449 expressed genes (tpDEGs) (**Fig S5B, supplementary file S6**). Through reprogramming  
450 the transcription of these tpDEGs that were highly enriched in key pathways from  
451 protein synthesis and processing to RNA splicing and to amino acid and central  
452 carbon metabolism (**Fig.S5C**), HBV might reshape the homeostasis and functionality  
453 of these pathways to manipulate the activities of the concerned processes.

454

455 At the level of translation, RiboSeq revealed that HBV induced a major shutoff on  
456 mRNA translation of 939 previously annotated host genes, seemingly to favor the  
457 expression of virus genes, while specifically up-regulating the translation of 39 host  
458 genes (**Fig S5B, supplementary file S7**). In KEGG enrichment analyses, these 978  
459 translational DEGs (tlDEGs) were typically over-presented with several signaling  
460 pathways from necroptosis to Hippo signaling, which might profoundly impact the  
461 cellular responses to HBV (**Fig S5D**).

462

463 Interestingly, a small set of ttDEGs whose expression was impacted by HBV both  
464 transcriptionally and translationally (**Fig.2C**). Importantly, HBV gene expression  
465 seemed to be pronouncedly affected upon the reinstatement of the homeostasis of  
466 SIRT6, and PGAM5, suggesting that SIRT6 and PGAM5 might serve as host-  
467 restrictive factors (**Fig.2F-G, Fig.4A**). On the other hand, stress-inducible protein  
468 PPP1R15A was up-regulated by HBV and its ectopic expression was found to  
469 suppress HBV. Given the protective role of PPP1R15A in preventing liver injury, did  
470 HBV up-regulate PPP1R15A to put on a self-restriction on its own proliferation and

471 gene expression while suppressing the host immune response? This question remains  
472 to be answered.

473

474 Interestingly, a small set of genes which has transcription corepressor activity was  
475 impacted by HBV transcriptionally (**Fig. 3A**), and SIRT6 may represent one of the  
476 critical epigenetic regulating nodes targeted by HBV. Indeed, the expression of up-  
477 stream regulators and down-stream effectors mediated by SIRT6 were altered by  
478 HBV (**Fig. 3C** and **3D**). Importantly, HBV was found to down-regulate endogenous  
479 SIRT6, not only in the cell-based HBV infection models, but also in HBV infected  
480 patient's livers and HBV-loaded mice (**Fig. 3E-I**, **Fig. S7C** and **S7D**). Moreover,  
481 HBV gene expression seemed to be pronouncedly affected upon the changed level of  
482 SIRT6, suggesting that SIRT6 might serve as host-restrictive factors (**Fig. 4A**, **S8C**,  
483 **S8D**). Mechanistically, overexpression of SIRT6 was found to curtail HBV DNA  
484 replication and silence virus gene expression involving sequestering HBcAg during  
485 viral replication and deacetylating Histone 3 at K9 and K56 through directly binding  
486 to mini-chromosome (**Fig. 5A-E**).

487

488 In principle, targeted manipulation of the expression and functionality of HBV-  
489 specific ttDEGs may thus represent unprecedented opportunities to combat HBV  
490 infection and the related diseases. Recent development of MDL-800 as a specific  
491 allosteric agonist of SIRT6<sup>22</sup> has empowered us to test whether chemical activation,  
492 rather than overexpression, of endogenous SIRT6, would have any effect on HBV  
493 replication and gene expression. The structure of MDL800 and SIRT6 co-  
494 crystallization was determined before and the specificity and effectiveness of  
495 MDL800 was confirmed in SIRT6 knockout hepatoma cell lines and by using *in vitro*  
496 synthesized KQTARK-ac-STGGWW peptide, respectively<sup>22</sup>. With the encouraging  
497 data that MDL-800 could efficiently suppress HBV gene expression and/or genome  
498 replication in transient transfection cell systems, stable replication cell systems, *de*

499 *novo* infection cell systems, and mouse models with negligible toxicity (**Fig. 4I-K, 5F,**  
500 **6A-B, 6C-F, Fig. S9A-D**), MDL-800 was thus emerging as a promising lead  
501 compound for HBV treatment with clear and specific mode of action.

502

503 Altogether, we have presented here a multiomics landscape of the HBV-host  
504 interaction through ribosome profiling, SILAC and RNA-sequencing analysis. By  
505 identifying translational products of the ncORFs and discovering multiple  
506 transcriptional DEGs, which all contributed to HBV-induced changes in the  
507 proteostasis network of host cells, these findings have opened an new avenue to  
508 identify potential drug targets, biomarkers, neoantigens or even lead compound, as  
509 showcased with ncGRWD1, ncPON2, PPP1R15A, PGAM5, SIRT6, and MDL-800  
510 (**Fig.6G**). To develop novel therapeutics, and potential diagnostics and prognostics in  
511 combating microbial infection, more -omics work should be performed to gain better  
512 global and detailed view of virus-host interactions<sup>1</sup>. This study was but one example.

513

514

## 515 **Materials and Methods**

516 **Cells, antibodies, reagents and constructs.** Huh7.5.1, HepG2, HEK293T,  
517 HEK293FT and HepG2-NTCP cells were maintained in Dulbecco's modified Eagle's  
518 medium (DMEM) (Hyclone) supplemented with 10% fetal bovine serum (FBS) and  
519 100 units/ml of penicillin-streptomycin (Gibco), in a humidified incubator  
520 supplemented with 5% CO<sub>2</sub> at 37°C (Thermo Scientific). HepAD38 cells were  
521 cultured as previously described<sup>26</sup>. (For details of antibodies, reagents and constructs,  
522 see **Supplementary file S11**).

523

524 **RiboCode analysis and annotation.** Here, non-rRNA sequencing reads were aligned  
525 to human genomic reference (hg38) using STAR program. Then, the Ribocode<sup>29</sup>  
526 pipeline was used to determine translated regions in ribosome profiling data from  
527 HBV and control group.

528

529 ORFs were annotated according to the location of their start codons in the structure of  
530 the original ORFs: "annotated" (are perfectly matched to the previously known  
531 annotated ORFs); "unannotated" (are translated from RNAs from the "non-transcribed"  
532 intergenic or intragenic regions in human genome); "nonoverlap\_uORF" (with start  
533 codons upstream to those of the previously annotated ORFs, with the resulted frames  
534 not overlapping with the known ORFs); "nonoverlap\_dORF" (with start codons  
535 downstream to those of the annotated ORFs, not overlapping with the annotated  
536 ORFs), "Overlap\_uORF" (with start codons upstream to those of the previously  
537 annotated ORFs, with resulted frames overlapping the annotated ORFs),  
538 "Overlap\_dORF" (with start codons downstream to those of the annotated ORFs,  
539 overlapping to the annotated ORFs), "Internal" (Start codons in the internal region of  
540 the known ORFs, with resulted frames not overlapping with those of the original  
541 ORFs); "Other" (ORFs that originated from RNAs transcribed either from the

542 intergenic genomic regions defined as “non-coding” before, or from the on-  
543 transcribed regions in the known genes).

544

545 **Stable isotope labeling by amino acids in cell culture (SILAC).** SILAC was  
546 performed as previous described, briefly, HepG2 or HepAD38 cell lines were  
547 passaged at 80% confluence in heavy (L - lysine - 2HCL(13C6 15N2, 98% isotopic  
548 purity) and L - arginine - HCL(13C6 15N4, 98% )), middle (L - lysine - 2HCL  
549 (4,4,5,5 D4, 98%) and L - arginine - HCL(13C6, 98%)) or light (normal) SILAC  
550 media. Cells were grown to confluence and passaged for ten passages. Cells were  
551 collected at the 4<sup>th</sup>, 8<sup>th</sup>, or 10<sup>th</sup> for determination of labeling efficiency, when it  
552 reached 95%, cells were washed with ice-cold PBS, and then lysed with SDT buffer  
553 (2% SDS(w/v), 0.1M DTT, 0.1M Tris, pH 7.6), cell lysates were collected and  
554 boiled, and centrifuged at 15000g for 15 minutes, the supernatants were collected and  
555 stored at -80°C. Before mass spectrometry analysis, Proteins in each cell lysate were  
556 quantitated by gel-electrophoresis and Commassie brilliant blue staining, and imagJ  
557 analysis, and 20µg from heavy, middle and light conditions were mixed together and  
558 then subjected to mass spectrometry at Beijing Proteome Research Center, BPRC.  
559 Data were searched using the Maxquant search engine<sup>31</sup> with two sequence databases,  
560 respectively, including normal human protein sequence from UNIPROT database and  
561 protein sequence of non-canonical ORFs from RiboCode. Manual analysis of MS/MS  
562 matches confirmed 47 ncORF peptide sequences (**Supplementary File S3**).

563

564 **Ribosome profiling, RNA-seq, and data processing.** Ribosome profiling was  
565 performed as previously described<sup>59</sup>, with some modification. Briefly, before cell  
566 lysis, the control groups and experiment groups were pretreated with Harringtonine at  
567 the concentration of 2µg/ml in 37°C for 120s, and then add cycloheximide at the  
568 concentration of 100µg/ml, mix well and proceed to the next step quickly. Lysates of a  
569 10 cm dish cells were treated with 750 U RNase I (Invitrogen, cat. No. AM2294) for

570 45 minutes at room temperature, then transferred to an ultracentrifuge tube on a  
571 sucrose cushion (~34%) and centrifuged at 70,000 rpm at 4°C for 4 hr. (Hitachi  
572 CS150GX). Ribosome-protected fragments were purified using miRNeasy RNA  
573 isolation kit (QIAGEN, cat. No. 217004). RNA was size selected, and then  
574 dephosphorylated, linker ligated, and then subjected to RT-PCR, circularization,  
575 rRNA depletion, and 10-12 cycles of PCR. The enzymes used were T4 PNK (NEB,  
576 cat. No. M0201S), T4 RNA ligase 2, truncated (NEB, cat. No. M0242S), Universal  
577 miRNA Cloning Linker (NEB, cat. No. S1315S), Superscript III (Invitrogen, cat. No  
578 18080-044), Circ Ligase (Epicentre, cat. No. CL4111K), NEBNext® High-Fidelity  
579 2X PCR Master Mix (cat. No. M0541L). Resulting fragments were size selected from  
580 an 8% acrylamide non-denaturing gel and purified by incubation with DNA gel  
581 extraction buffer (300 mM NaCl, 10 mM Tris (pH 8) and 1 mM EDTA). Ribosome  
582 footprint libraries were analyzed on agilent 2100 bioanalyzer and sequenced on  
583 HiSeq2500 platform. The sequencing data was preprocessed by discarding low-  
584 quality reads, trimming adapter sequence, removing ribosomal RNA (rRNA) derived  
585 reads<sup>59</sup>. Next, non-rRNA sequencing reads was aligned to human genomic reference  
586 (hg38) using HISAT2. The abundance of these transcripts in each sample was  
587 computed with StringTie and Ballgown<sup>60</sup>, only genes with reads numbers above 5  
588 were selected. Differential expression was determined using one-side T-test. Genes  
589 with p-value  $\leq 0.05$  and  $|FC| \geq 1.5$  were considered as differentially expressed genes  
590 (DEGs).

591

592 For RNA-seq, total RNA of cells was extracted by Trizol (Invitrogen) according to  
593 manufacturer's instructions, and then poly-A-selected using NEBNext® Poly(A)  
594 mRNA Magnetic Isolation Module (Catalog # E7490S). The Quality of the poly-A-  
595 selected RNA was analyzed using Agilent 2100 Bioanalyzer. Library preparation  
596 using Illumina TrueSeq mRNA sample preparation kit (Catalog IDs: RS-122-2001)  
597 was accomplished at the National Center of Plant Gene Research (Shanghai), and

598 cDNA library was sequenced on Illumina HiSeq 2500. The sequencing reads was  
599 aligned to human genomic reference (hg38) using HISAT2. The abundance of these  
600 transcripts in each sample was computed with StringTie and Ballgown<sup>60</sup>. Differential  
601 expression was determined using DESeq2. Genes with adjust p-value  $\leq 0.05$  and  
602  $|FC| \geq 1.5$  were considered as differentially expressed genes (DEGs). Gene Ontology  
603 enrichment of the identified DEGs was performed using DAVID. The GO terms of  
604 transcription molecular function were selected. Volcano plots, heatmap were drawn in  
605 RStudio with the ggplot2 packages. The visualization of mapping results was  
606 performed by Integrative Genomics Viewer<sup>61</sup>.

607

608 **Western blotting.** Cells were lysed in 1× SDS-PAGE loading buffer (10% glycerol,  
609 50 mM Tris-HCl, pH 6.8, 1%  $\beta$ -mercaptoethanol, 0.08% bromophenol blue, 2%  
610 SDS). Protein electrophoresis was conducted using SDS-PAGE gels, transferred to  
611 PVDF membranes (Bio-Rad). Membranes were blocked, incubated with primary  
612 antibodies overnight at 4°C, and then washed with TBST for three times, incubated  
613 with secondary antibodies for 60 min at room temperature, and again washed in TBST  
614 for three times, and then incubated with high-sig ECL western blotting  
615 luminol/enhancer solution (Tanon, Cat. No. 180-5001). Protein bands were visualized  
616 using Tanon-5200 (Tanon). The bands intensity was calculated by ImagJ.

617

618 **Cell transfection.** The transfection of Huh7.5.1 cells and Huh7 cells in ribosome  
619 profiling and RNA-seq experiments were transfected with indicated plasmids using  
620 Lipofectamine 2000 (Life Technologies). si-RNA transfection was performed using  
621 MaxFection™ 8600 Transfection Reagent (Biomaterials USA, cat. No. MF8600-001)  
622 according to the manufacturer's instructions. Other transfection experiments were  
623 conducted using polyethylenimine (Sigma) if not otherwise mentioned. (For the  
624 sequences of siSIRT6, see **Supplementary file S11**).

625

626 **Stable gene knockdown and overexpression.** Lentiviral particles harboring SIRT6  
627 overexpression vector (pCDH; Addgene) or *sirt6* shRNA expression vector (pLKO.1;  
628 Sigma-Aldrich) were produced by transfection of HEK293FT cells with indicated  
629 plasmids and lentiviral packaging plasmid mix. HepG2 or HepAD38 cells were  
630 transduced by the harvested viral supernatants in the presence of 8 µg/ml polybrene  
631 (Sigma), followed by selection with 2 µg/ml puromycin (Clontech). (For the  
632 sequences of shSIRT6, see **Supplementary file S11**).

633

634 **Co-immunoprecipitation (Co-IP) assay.** For Co-immunoprecipitation assay, 48h  
635 after transfection, HEK293T cells were incubated in co-IP buffer (50 mM Tris-HCl,  
636 pH 7.4, 150 mM NaCl, 5mM EDTA, 10% Glycerol, 0.5% NP-40) plus 1 mM NaF,  
637 1mM Na<sub>3</sub>VO<sub>4</sub> and 1% protease inhibitor cocktail (bimake, cat. No. B14001),  
638 followed by ultra-sonication. After spin at full speed at 4°C for 10min, the  
639 corresponding antibody-conjugated beads were added into supernatant. After  
640 incubation at 4°C, the beads were washed and boiled in 2× SDS-PAGE loading buffer,  
641 and then subjected to western blotting with indicated primary antibodies.

642

643 **Immunofluorescence assay.** For immunofluorescence assay, cells were washed with  
644 phosphate buffered saline, fixed with 4% paraformaldehyde, then permeabilized for  
645 with 0.1% Triton X-100, and then blocked at room temperature for 1h in 1.0% BSA,  
646 after wash with PBST, cells were incubated with indicated primary antibodies, and  
647 then incubated with Alexa Fluor 488 (A11029, Thermo Fisher) or Alexa Fluor 647  
648 (A21245, Thermo Fisher)-conjugated secondary antibodies. Cell nucleus was stained  
649 with DAPI (Thermo Fisher). Images were obtained using an Olympus BX51  
650 microscope (Olympus) or Leica TCS SP8 confocal microscope (Leica).

651

652 **ELISA.** HBsAg and HBeAg from supernatants of HBV replicating cells were  
653 measured using the ELISA kits (Shanghai Kehua Bio-engineering Co., Ltd) according



654 to the manufacturer's instructions. The medium was changed the day before  
655 collection.

656

657 **Chromatin immunoprecipitation (ChIP).** ChIP for H3K56ac ,H3K9ac and SIRT6  
658 was performed according to the standard protocols<sup>23</sup>, with some modifications.  
659 Briefly, hepatoma cells were suspended and cross-linked with 1% formaldehyde at  
660 room temperature for, quenched with 2.5 M glycine, washed in ice-cold PBS buffer,  
661 and lysed with 1×SDS lysis buffer (1% SDS, 10 mM EDTA, 50 mM Tris-HCl, pH  
662 8.0). Cellular lysates were sonicated with high power, 30s on 30s off for 35 cycles,  
663 diluted in ChIP dilution buffer (SDS 0.01%, 1.1% Triton X-100, 1.2 mM EDTA, 16.7  
664 mM Tris-HCl, 167 mM NaCl, pH8.0), and immunoprecipitated with indicated  
665 antibodies. Normal rabbit IgG (Santa Cruz biotechnology) was used as negative  
666 control. Immunoprecipitates were collected with Protein A/G-agarose beads (Merk  
667 millipore) and washed sequentially with low-salt wash buffer (0.1% SDS, 1% Triton  
668 X-100, 2 mM EDTA, 20 mM Tris-HCl, pH 8.0, 150 mM NaCl), high-salt wash buffer  
669 (0.1% SDS, 1% Triton X-100, 2 mM EDTA, 20 mM Tris-HCl, pH 8.0, 500 mM  
670 NaCl), LiCl immune complex wash buffer (0.25 M LiCl, 1% NP40, 1% deoxycholate,  
671 1 mM EDTA, 10 mM Tris-HCl, pH 8.0), and TE buffer (10 mM Tris-HCl, 1 mM  
672 EDTA, pH 8.0), DNA–protein immune complexes were eluted by elution buffer (1%  
673 SDS, 0.1 M NaHCO<sub>3</sub>). Then NaCl were added and samples were heated to 65 °C for  
674 4 hours, and then treated with proteinase K at 45 °C for 1 h. DNA was purified by  
675 standard phenol chloroform extraction protocol and assayed by quantitative PCR on a  
676 CFX96 real-time PCR system (Bio-Rad) or LC96 (Roche) with Talent qPCR PreMix  
677 (SYBR Green, TIANGEN). Fold enrichment was calculated as percentage input and  
678 normalized to total H3. (For the sequence of qPCR primers, see **Supplementary file**  
679 **S11**).

680

681 **Southern blot analysis of HBV DNA.** HBV DNA Southern blot was conducted

682 following a modified procedure as described previously<sup>62</sup>. Briefly, after transfected  
683 with HBV rcccDNA, Huh7.5.1 cells were lysed with 0.5% NP-40 in TBS (10 mM  
684 Tris-HCl [pH 7.0], 150 mM NaCl), Nuclei were pelleted by brief centrifugation. To  
685 selectively extract HBV DNA from intracellular core particles, cytoplasmic lysates  
686 were treated with micrococcal nuclease (Amersham Biosciences) to remove input  
687 plasmid DNA. After 1% SDS digestion containing protease K for 2 h at 55°C, viral  
688 DNA was ethanol precipitated. rcccDNA in the nuclei was purified with similar  
689 procedure in Hirt extraction<sup>63</sup>. The nuclear pellet was resuspended in 1 ml SDS lysis  
690 buffer (50 mM Tris-HCl [pH 8.0], 10 mM EDTA, 150 mM NaCl, and 0.5% SDS),  
691 mixed with 0.25 ml of 2.5 M KCl, and incubated at 4°C with gentle rotation  
692 overnight. The lysate was centrifuged at 14,000 ×g for 20 min and rcccDNA was  
693 further extracted with phenol and chloroform, followed by ethanol precipitation.

694

695 **Purification of HBV virus.** HepAD38 cells were maintained in complete DMEM/F-  
696 12 medium in the presence of 2% DMSO. After tetracycline withdraws for 12 days,  
697 the culture medium was filtered through 0.45µm filter and then precipitated at 4°C in  
698 the presence of 8% PEG8000 overnight. The pellets were collected through  
699 centrifugation at 10000g and suspended in PBS with 20% glycerol, after brief  
700 centrifugation, the aliquots were stored at -80°.

701

702 **HBV *de novo* infection of HepG2-NTCP.** HBV infection experiment was performed  
703 as described previously<sup>24</sup>, with some modifications. Briefly, HepG2-NTCP cells were  
704 seed in 24-well plates with complete DMEM for 24 h, and then cultured with PMM  
705 medium for another 24 hours. The cells were then inoculated with HBV purified from  
706 culture medium of HepAD38 cells at multiplicity of 100 genome equivalents for  
707 16~24 hours at 37°C, then each well was washed with 500 microliter PMM for three  
708 times, and then 500 µl fresh PMM were added in the presence or absence of 5µM  
709 MDL800. Mock infection was inoculated with PMM medium in the presence of 4%

710 PEG8000. Cells were maintained in PMM, and medium was changing every other day  
711 until supernatants were collected.

712

713 **Mice and *in vivo* chemical test.** Mouse study was conducted as described  
714 previously<sup>25</sup>. Briefly, wild type (WT) male mice (C57BL/6) (4-5 weeks) were  
715 hydrodynamic injected with a modified rcccDNA system harboring  $\beta$ 2-microglobulin-  
716 specific shRNA (shB2M) to reduce T-cell response. 4  $\mu$ g prcccDNA-shB2M and 4  $\mu$ g  
717 pCMV-Cre were co-injected within 5 to 8s through tail veins in a volume of DPBS  
718 equivalent to 8% of the mouse body weight. Alb-Cre Transgenic mice (C57BL/6-Tg  
719 [Alb-Cre] 21Mgn/J) using albumin promoter to express Cre recombinase were  
720 obtained from Jackson Laboratory (Bar Harbor, ME). For Ad-GFP/rcccDNA  
721 transduction,  $1.5 \times 10^9$  PFU of vehicle were intravenously introduced into Alb-Cre  
722 Transgenic mice (6–8 weeks).

723

724 For *in vivo* test of MDL800, mice were randomly divided into two groups according  
725 to the HBsAg unit in serum to avoid bias 3 days after plasmid co-injection;  
726 MDL800 was dissolved in 5% DMSO, 30% PEG-400, 65% saline, with 1.5 Meq 1N  
727 NaOH, and administrated via intraperitoneal injection at the dose of 65mg/kg body  
728 weight/day continuously for two weeks. The investigators were not blinded to the  
729 group allocation. All animal studies were approved by the Animal Ethics Committee  
730 of Institute Pasteur of Shanghai (no. A2012008-2), Chinese Academy of Sciences.

731

732 ***In vitro* chemical test.** MDL800 was resolved in DMSO (Sigma) with 100mM. For  
733 Huh7.5.1 and HepG2 cells, MDL800 was added with indicated final concentrations  
734 by changing fresh medium at day 1 and 2 post prcccDNA and pCMV-Cre  
735 transfection. The supernatants and cell lysates were harvested at day three post  
736 transfection and subjected to ELISA and western blotting. For HepAD38, after  
737 tetracycline removing, chemical was added similar to Huh7.5.1.

738

## 739 **Patients**

740 Liver biopsies were acquired from Ruijin Hospital and Eastern Hepatobiliary Surgery  
741 Hospital and stored at -80° C before use. This study was approved by the  
742 Institutional Ethics Review Committee at Ruijin Hospital and Ethic Committee of  
743 Eastern Hepatobiliary Surgery Hospital. Written informed consent was obtained from  
744 each patient.

745

746 **Statistics.** All experimental data were expressed as  $\pm$  standard deviation (SD).  
747 Unpaired Student's two-tailed *t*-test was performed with GraphPad Prism software.  
748 All experiments were performed at least three times independently, only *P* value of <  
749 0.05 was considered to be statistically significant, *P* <0.05, \*; *P* <0.01, \*\*; *P* <0.001,  
750 \*\*\*.

751

752

753

## 754 **References**

- 755 1 Revill, P. A. *et al.* A global scientific strategy to cure hepatitis B. *Lancet Gastroenterol Hepatol*  
756 **4**, 545-558, doi:10.1016/S2468-1253(19)30119-0 (2019).
- 757 2 Shirvani-Dastgerdi, E., Schwartz, R. E. & Ploss, A. Hepatocarcinogenesis associated with  
758 hepatitis B, delta and C viruses. *Current opinion in virology* **20**, 1-10,  
759 doi:10.1016/j.coviro.2016.07.009 (2016).
- 760 3 Belloni, L. *et al.* Nuclear HBx binds the HBV minichromosome and modifies the epigenetic  
761 regulation of cccDNA function. *Proc Natl Acad Sci U S A* **106**, 19975-19979,  
762 doi:10.1073/pnas.0908365106 (2009).
- 763 4 Zhang, W. *et al.* PRMT5 restricts hepatitis B virus replication through epigenetic repression of  
764 covalently closed circular DNA transcription and interference with pregenomic RNA  
765 encapsidation. *Hepatology* **66**, 398-415, doi:10.1002/hep.29133 (2017).
- 766 5 Urban, S. & Bertolotti, A. Editorial overview: Antiviral strategies: Virological and  
767 immunological basis for HBV cure. *Current opinion in virology* **30**, iv-vi,  
768 doi:10.1016/j.coviro.2018.05.001 (2018).
- 769 6 Riviere, L. *et al.* HBx relieves chromatin-mediated transcriptional repression of hepatitis B  
770 viral cccDNA involving SETDB1 histone methyltransferase. *Journal of hepatology* **63**, 1093-  
771 1102, doi:10.1016/j.jhep.2015.06.023 (2015).

- 772 7 Liu, F. *et al.* Alpha-interferon suppresses hepadnavirus transcription by altering epigenetic  
773 modification of cccDNA minichromosomes. *PLoS pathogens* **9**, e1003613,  
774 doi:10.1371/journal.ppat.1003613 (2013).
- 775 8 Hong, X., Kim, E. S. & Guo, H. Epigenetic regulation of hepatitis B virus covalently closed  
776 circular DNA: Implications for epigenetic therapy against chronic hepatitis B. *Hepatology* **66**,  
777 2066-2077, doi:10.1002/hep.29479 (2017).
- 778 9 Trepo, C., Chan, H. L. & Lok, A. Hepatitis B virus infection. *Lancet* **384**, 2053-2063,  
779 doi:10.1016/S0140-6736(14)60220-8 (2014).
- 780 10 Jagya, N. *et al.* RNA-seq based transcriptome analysis of hepatitis E virus (HEV) and hepatitis  
781 B virus (HBV) replicon transfected Huh-7 cells. *PLoS One* **9**, e87835,  
782 doi:10.1371/journal.pone.0087835 (2014).
- 783 11 Lamontagne, J., Mell, J. C. & Bouchard, M. J. Transcriptome-Wide Analysis of Hepatitis B  
784 Virus-Mediated Changes to Normal Hepatocyte Gene Expression. *PLoS pathogens* **12**,  
785 e1005438, doi:10.1371/journal.ppat.1005438 (2016).
- 786 12 Nosaka, T. *et al.* Gene expression profiling of hepatocarcinogenesis in a mouse model of  
787 chronic hepatitis B. *PLoS One* **12**, e0185442, doi:10.1371/journal.pone.0185442 (2017).
- 788 13 Winer, B. Y. *et al.* Analysis of host responses to hepatitis B and delta viral infections in a  
789 micro-scalable hepatic co-culture system. *Hepatology*, doi:10.1002/hep.30815 (2019).
- 790 14 Ingolia, N. T., Ghaemmaghami, S., Newman, J. R. & Weissman, J. S. Genome-wide analysis in  
791 vivo of translation with nucleotide resolution using ribosome profiling. *Science* **324**, 218-223,  
792 doi:10.1126/science.1168978 (2009).
- 793 15 Ingolia, N. T. Ribosome Footprint Profiling of Translation throughout the Genome. *Cell* **165**,  
794 22-33, doi:10.1016/j.cell.2016.02.066 (2016).
- 795 16 Jackson, R. *et al.* The translation of non-canonical open reading frames controls mucosal  
796 immunity. *Nature* **564**, 434-438, doi:10.1038/s41586-018-0794-7 (2018).
- 797 17 Ong, S. E. *et al.* Stable isotope labeling by amino acids in cell culture, SILAC, as a simple and  
798 accurate approach to expression proteomics. *Mol Cell Proteomics* **1**, 376-386,  
799 doi:10.1074/mcp.m200025-mcp200 (2002).
- 800 18 Chalkiadaki, A. & Guarente, L. The multifaceted functions of sirtuins in cancer. *Nat Rev Cancer*  
801 **15**, 608-624, doi:10.1038/nrc3985 (2015).
- 802 19 Kugel, S. & Mostoslavsky, R. Chromatin and beyond: the multitasking roles for SIRT6. *Trends*  
803 *Biochem Sci* **39**, 72-81, doi:10.1016/j.tibs.2013.12.002 (2014).
- 804 20 Deng, J. J. *et al.* Interplay between SIRT1 and hepatitis B virus X protein in the activation of  
805 viral transcription. *Biochim Biophys Acta Gene Regul Mech* **1860**, 491-501,  
806 doi:10.1016/j.bbagrm.2017.02.007 (2017).
- 807 21 Ren, J. H. *et al.* SIRT3 restricts hepatitis B virus transcription and replication through  
808 epigenetic regulation of covalently closed circular DNA involving suppressor of variegation 3-  
809 9 homolog 1 and SET domain containing 1A histone methyltransferases. *Hepatology* **68**,  
810 1260-1276, doi:10.1002/hep.29912 (2018).
- 811 22 Huang, Z. *et al.* Identification of a cellularly active SIRT6 allosteric activator. *Nat Chem Biol* **14**,  
812 1118-1126, doi:10.1038/s41589-018-0150-0 (2018).
- 813 23 Qi, Z. *et al.* Recombinant covalently closed circular hepatitis B virus DNA induces prolonged

- 814 viral persistence in immunocompetent mice. *J Virol* **88**, 8045-8056, doi:10.1128/JVI.01024-14  
815 (2014).
- 816 24 Yan, H. *et al.* Sodium taurocholate cotransporting polypeptide is a functional receptor for  
817 human hepatitis B and D virus. *eLife* **3**, doi:10.7554/eLife.00049 (2012).
- 818 25 Li, G. *et al.* Recombinant covalently closed circular DNA of hepatitis B virus induces long-term  
819 viral persistence with chronic hepatitis in a mouse model. *Hepatology* **67**, 56-70,  
820 doi:10.1002/hep.29406 (2018).
- 821 26 Ladner, S. K. *et al.* Inducible expression of human hepatitis B virus (HBV) in stably transfected  
822 hepatoblastoma cells: a novel system for screening potential inhibitors of HBV replication.  
823 *Antimicrobial agents and chemotherapy* **41**, 1715-1720 (1997).
- 824 27 Sendoel, A. *et al.* Translation from unconventional 5' start sites drives tumour initiation.  
825 *Nature* **541**, 494-499, doi:10.1038/nature21036 (2017).
- 826 28 Meydan, S. *et al.* Programmed Ribosomal Frameshifting Generates a Copper Transporter and  
827 a Copper Chaperone from the Same Gene. *Mol Cell* **65**, 207-219,  
828 doi:10.1016/j.molcel.2016.12.008 (2017).
- 829 29 Xiao, Z. *et al.* De novo annotation and characterization of the translome with ribosome  
830 profiling data. *Nucleic Acids Res* **46**, e61, doi:10.1093/nar/gky179 (2018).
- 831 30 Ong, S. E. & Mann, M. A practical recipe for stable isotope labeling by amino acids in cell  
832 culture (SILAC). *Nature protocols* **1**, 2650-2660, doi:10.1038/nprot.2006.427 (2006).
- 833 31 Cox, J. & Mann, M. MaxQuant enables high peptide identification rates, individualized p.p.b.-  
834 range mass accuracies and proteome-wide protein quantification. *Nature biotechnology* **26**,  
835 1367-1372, doi:10.1038/nbt.1511 (2008).
- 836 32 Sugimoto, N. *et al.* Cdt1-binding protein GRWD1 is a novel histone-binding protein that  
837 facilitates MCM loading through its influence on chromatin architecture. *Nucleic Acids Res* **43**,  
838 5898-5911, doi:10.1093/nar/gkv509 (2015).
- 839 33 Decorsiere, A. *et al.* Hepatitis B virus X protein identifies the Smc5/6 complex as a host  
840 restriction factor. *Nature* **531**, 386-389, doi:10.1038/nature17170 (2016).
- 841 34 Higa, L. A. *et al.* CUL4-DDB1 ubiquitin ligase interacts with multiple WD40-repeat proteins  
842 and regulates histone methylation. *Nat Cell Biol* **8**, 1277-1283, doi:10.1038/ncb1490 (2006).
- 843 35 Ng, C. J. *et al.* Paraoxonase-2 is a ubiquitously expressed protein with antioxidant properties  
844 and is capable of preventing cell-mediated oxidative modification of low density lipoprotein.  
845 *The Journal of biological chemistry* **276**, 44444-44449, doi:10.1074/jbc.M105660200 (2001).
- 846 36 Fenwick, M. L. & Clark, J. Early and delayed shut-off of host protein synthesis in cells infected  
847 with herpes simplex virus. *The Journal of general virology* **61 (Pt I)**, 121-125,  
848 doi:10.1099/0022-1317-61-1-121 (1982).
- 849 37 Xiao, H., Neuveut, C., Benkirane, M. & Jeang, K. T. Interaction of the second coding exon of  
850 Tat with human EF-1 delta delineates a mechanism for HIV-1-mediated shut-off of host mRNA  
851 translation. *Biochemical and biophysical research communications* **244**, 384-389,  
852 doi:10.1006/bbrc.1998.8274 (1998).
- 853 38 Wang, Z. G., Jiang, H., Chen, S., Du, F. H. & Wang, X. D. The Mitochondrial Phosphatase  
854 PGAM5 Functions at the Convergence Point of Multiple Necrotic Death Pathways. *Cell* **148**,  
855 228-243, doi:10.1016/j.cell.2011.11.030 (2012).

- 856 39 He, G. W. *et al.* PGAM5-mediated programmed necrosis of hepatocytes drives acute liver  
857 injury. *Gut* **66**, 716-723, doi:10.1136/gutjnl-2015-311247 (2017).
- 858 40 Liang, Y. *et al.* SRSF2 mutations drive oncogenesis by activating a global program of aberrant  
859 alternative splicing in hematopoietic cells. *Leukemia* **32**, 2659-2671, doi:10.1038/s41375-018-  
860 0152-7 (2018).
- 861 41 Etchegaray, J. P. *et al.* The histone deacetylase SIRT6 controls embryonic stem cell fate via  
862 TET-mediated production of 5-hydroxymethylcytosine. *Nat Cell Biol* **17**, 545-557,  
863 doi:10.1038/ncb3147 (2015).
- 864 42 Michishita, E. *et al.* SIRT6 is a histone H3 lysine 9 deacetylase that modulates telomeric  
865 chromatin. *Nature* **452**, 492-496, doi:10.1038/nature06736 (2008).
- 866 43 Yang, B., Zwaans, B. M., Eckersdorff, M. & Lombard, D. B. The sirtuin SIRT6 deacetylates H3  
867 K56Ac in vivo to promote genomic stability. *Cell Cycle* **8**, 2662-2663, doi:10.4161/cc.8.16.9329  
868 (2009).
- 869 44 Zhong, L. *et al.* The histone deacetylase Sirt6 regulates glucose homeostasis via Hif1alpha.  
870 *Cell* **140**, 280-293, doi:10.1016/j.cell.2009.12.041 (2010).
- 871 45 Sebastian, C. *et al.* The histone deacetylase SIRT6 is a tumor suppressor that controls cancer  
872 metabolism. *Cell* **151**, 1185-1199, doi:10.1016/j.cell.2012.10.047 (2012).
- 873 46 Tasselli, L., Zheng, W. & Chua, K. F. SIRT6: Novel Mechanisms and Links to Aging and Disease.  
874 *Trends Endocrinol Metab* **28**, 168-185, doi:10.1016/j.tem.2016.10.002 (2017).
- 875 47 Ronnebaum, S. M., Wu, Y., McDonough, H. & Patterson, C. The ubiquitin ligase CHIP prevents  
876 SirT6 degradation through noncanonical ubiquitination. *Molecular and cellular biology* **33**,  
877 4461-4472, doi:10.1128/MCB.00480-13 (2013).
- 878 48 Seto, E., Mitchell, P. J. & Yen, T. S. Transactivation by the hepatitis B virus X protein depends  
879 on AP-2 and other transcription factors. *Nature* **344**, 72-74, doi:10.1038/344072a0 (1990).
- 880 49 Zhang, X. *et al.* Identifying the functional contribution of the defatty-acylase activity of SIRT6.  
881 *Nat Chem Biol* **12**, 614-620, doi:10.1038/nchembio.2106 (2016).
- 882 50 Das, C., Lucia, M. S., Hansen, K. C. & Tyler, J. K. CBP/p300-mediated acetylation of histone H3  
883 on lysine 56. *Nature* **459**, 113-117, doi:10.1038/nature07861 (2009).
- 884 51 Van Meter, M. *et al.* SIRT6 represses LINE1 retrotransposons by ribosylating KAP1 but this  
885 repression fails with stress and age. *Nature communications* **5**, 5011,  
886 doi:10.1038/ncomms6011 (2014).
- 887 52 Guo, Y. H., Li, Y. N., Zhao, J. R., Zhang, J. & Yan, Z. HBc binds to the CpG islands of HBV cccDNA  
888 and promotes an epigenetic permissive state. *Epigenetics* **6**, 720-726 (2011).
- 889 53 Alter, H. *et al.* A research agenda for curing chronic hepatitis B virus infection. *Hepatology* **67**,  
890 1127-1131, doi:10.1002/hep.29509 (2018).
- 891 54 Yuan, S. *et al.* Translatomic profiling reveals novel self-restricting virus-host interactions  
892 during HBV infection. *Journal of hepatology* **2**, doi:10.1016/j.jhep.2021.02.009 (2021).
- 893 55 Xiang, C. *et al.* Long-term functional maintenance of primary human hepatocytes in vitro.  
894 *Science* **364**, 399-402, doi:10.1126/science.aau7307 (2019).
- 895 56 Sureau, C., Romet-Lemonne, J. L., Mullins, J. I. & Essex, M. Production of hepatitis B virus by a  
896 differentiated human hepatoma cell line after transfection with cloned circular HBV DNA. *Cell*  
897 **47**, 37-47 (1986).

- 898 57 Zhong, J. *et al.* Robust hepatitis C virus infection in vitro. *Proceedings of the National*  
899 *Academy of Sciences of the United States of America* **102**, 9294-9299,  
900 doi:10.1073/pnas.0503596102 (2005).
- 901 58 Duan, X. *et al.* MicroRNA 130a Regulates both Hepatitis C Virus and Hepatitis B Virus  
902 Replication through a Central Metabolic Pathway. *Journal of virology* **92**,  
903 doi:10.1128/JVI.02009-17 (2018).
- 904 59 Ingolia, N. T., Brar, G. A., Rouskin, S., McGeachy, A. M. & Weissman, J. S. The ribosome  
905 profiling strategy for monitoring translation in vivo by deep sequencing of ribosome-  
906 protected mRNA fragments. *Nature protocols* **7**, 1534-1550, doi:10.1038/nprot.2012.086  
907 (2012).
- 908 60 Pertea, M., Kim, D., Pertea, G. M., Leek, J. T. & Salzberg, S. L. Transcript-level expression  
909 analysis of RNA-seq experiments with HISAT, StringTie and Ballgown. *Nature protocols* **11**,  
910 1650-1667, doi:10.1038/nprot.2016.095 (2016).
- 911 61 Robinson, J. T. *et al.* Integrative genomics viewer. *Nature biotechnology* **29**, 24-26,  
912 doi:10.1038/nbt.1754 (2011).
- 913 62 Summers, J., Smith, P. M. & Horwich, A. L. Hepadnavirus envelope proteins regulate  
914 covalently closed circular DNA amplification. *Journal of virology* **64**, 2819-2824 (1990).
- 915 63 Gao, W. & Hu, J. Formation of hepatitis B virus covalently closed circular DNA: removal of  
916 genome-linked protein. *Journal of virology* **81**, 6164-6174, doi:10.1128/JVI.02721-06 (2007).

917

918

### 919 **Acknowledgments:**

920 We specifically acknowledge the excellent support from Dr. Chao Peng and the  
921 proteomics facility at the National Center for Protein Science (NCPS) Shanghai and  
922 the molecular biology, and cell biology in SIBCB. We thank Dr. Xuehui Huang, Qi  
923 Feng, Danlin Fan and Congcong Zhou at the National Center of Plant Gene Research  
924 (Shanghai) for their excellent technique support. We thank Prof. Shuqun Cheng at the  
925 Eastern Hepatobiliary Surgery Hospital and Dr. Yumin Xu at the Ruijin Hospital for  
926 providing human liver tissues. We thank Ms. Mei Lu, Dr. Yalan Wu and all other  
927 members of the laboratory for their help. **Funding:** This work was funded by  
928 Strategic Priority Research Program of the Chinese Academy of Sciences  
929 (XDB19000000, XDA12040323); National Natural Science Foundation of China  
930 (81525019); National Science and Technology Major Project (2018ZX10101004);  
931 National Key R&D program of China (2018YFA0508200); RH was also supported by



932 funding from Shanghai Institute of Organic Chemistry, Chinese Academy of Sciences  
933 (CAS) and the CAS Instrument Developing Project (YZ201339). **Author**  
934 **contribution:** RH designed and supervised the study. YSL led the project; YSL, GHL,  
935 YFZ, KW and WDX performed the experiments. WDX, KW, SG, PW and MD  
936 performed mass spectrum and analyzed data. MHZ performed all the bioinformatic  
937 analyses. KW prepared the Samples for SILAC while WX and PX performed the  
938 proteomic analysis. JZ directed the synthesis of MDL8000 and instructed its use in  
939 animals. QD and YZ were responsible for all the animal work. RH, YSL, MHZ and  
940 GHL drafted the manuscript with inputs from all other authors. All authors read, and  
941 approved the final manuscript. **Competing interests:** The authors declare no  
942 competing financial interests. **Data and materials availability:** All data needed to  
943 evaluate the conclusions in the paper are present in the paper and/or the  
944 Supplementary Materials. The generated data in this study have been deposited in the  
945 Gene Expression Omnibus (GEO, Accession No. GSE135860) and PRIDE  
946 (Accession No. PXD014908). To access the GEO data, using the secure:  
947 srqdeykspzmbhor. To access the PRIDE data, use this account:  
948 reviewer94895@ebi.ac.uk, Password: jf8PgTab. Additional data related to this paper  
949 may be requested from the authors.

## Figures

**Figure 1**

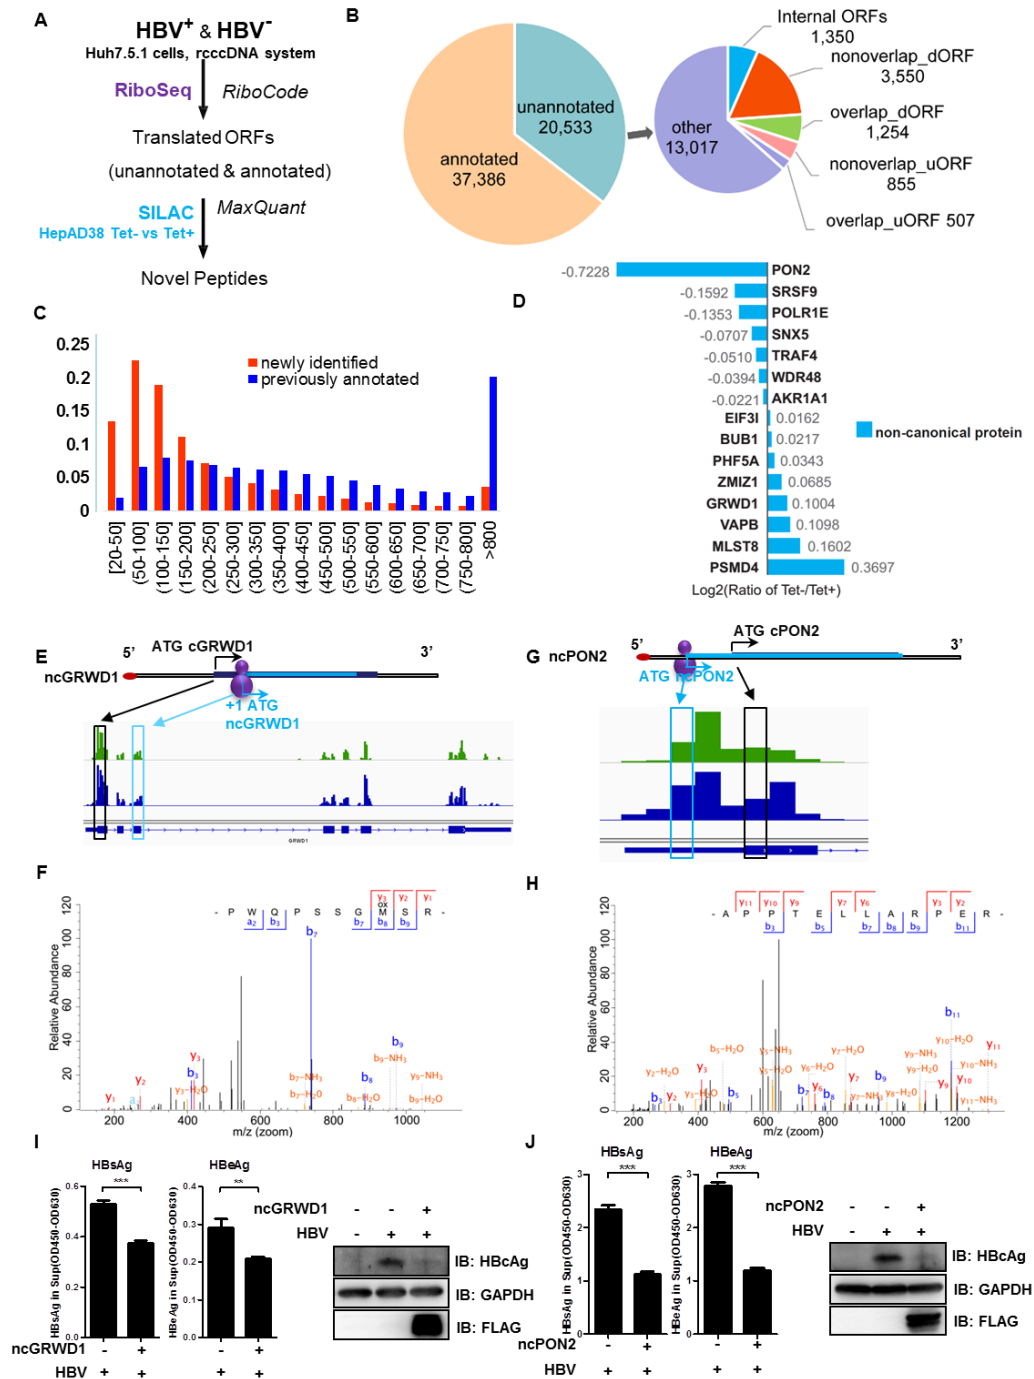

**Figure 1: Translation of non-canonical open reading frames (ncORFs) upon HBV replication. (A)** The workflow for identification of novel ncORFs. **(B)** The subtypes of all translated ORFs identified in this study, see materials and methods for

detail. **(C)** The lengths distribution of newly identified ncORFs (blue) and previously annotated ORFs (red). See supplementary materials for detail. **(D)** A list of genes near which the expression of non-canonical ORFs (ncORFs) were altered by HBV. The peptides derived from the translation of these ncORFs were assessed by SILAC, with bar chart to indicate their relative ratios in the presence versus absence of HBV. <sup>1</sup> Ribosome occupancy profiles of host ncORFs related to *GRWD1* (E) or *PON2* (G). HBV+ or HBV- of the translational pattern was depicted in green or blue, respectively. The annotated MS/MS spectra of two representative peptides uniquely matched to the translational products of ncGRWD1 (F) or ncPON2 (H) was shown, respectively. The canonical ATG was depicted as black; the non-canonical ATG and the ncORF derived peptide were labeled as cyan. **(I-J)** The inhibitory effect of ncGRWD1 (I) or ncPON2 (J) on expression of HBV antigens was shown. \*\*,  $p < 0.01$ , \*\*\*,  $p < 0.001$ . ELISA data are presented as bar chart ( $n = 3$ ).

**Figure 2**

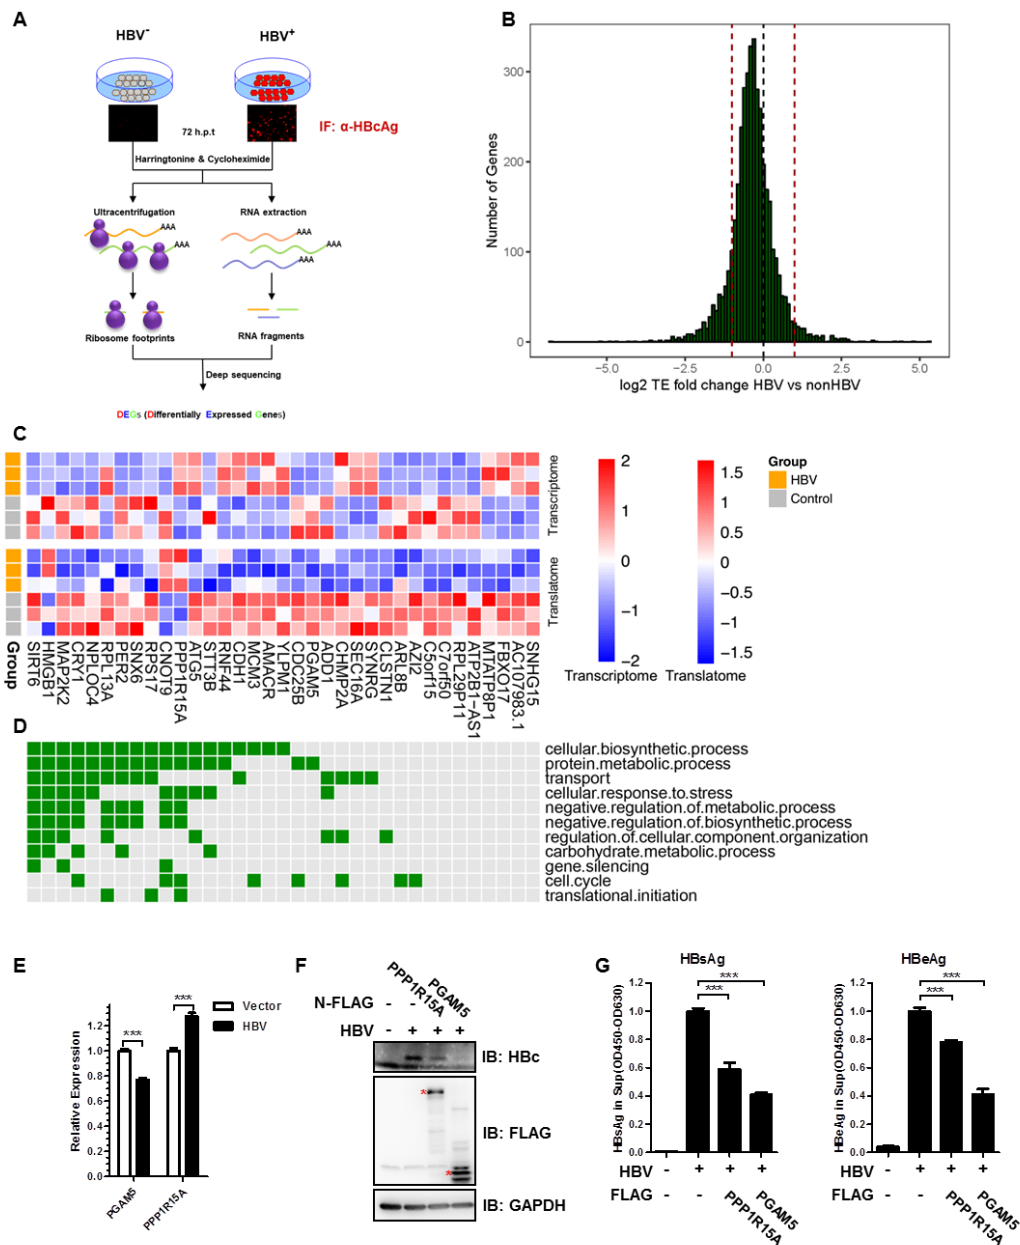

**Figure 2: HBV induces significant changes in 35 DEGs at both transcriptional and translational levels (ttDEGs) with PGAM5 and SIRT6 emerging as potential host virus-restricting factors.** (A) Experimental approaches for transcriptomic and translational profiling of host genes upon transfection with the Cre-based rcccdNA system of HBV. (B) Differential translational efficiency (TE=RPKM<sub>ribosome profiling</sub>/RPKM<sub>RNA-seq</sub>) in HBV replicating cells versus control cells. (C) Heatmap and (D) GO annotation of the 35 ttDEGs, whose expression was significantly altered by HBV in both transcription and translation. (E) RT-qPCR reveals that HBV down-regulated the transcriptional level of endogenous PGAM5 and up-regulated PPP1R15A transcription. (F-G) Reinstatement of the static levels of two

representative ttDEGs affected the expression of cellular HBc (F) and secreted HBs and HBe (G). The major bands were marked with asterisks to indicate the theoretical molecular weights of the ectopically expressed ttDEGs. \*,  $p < 0.05$ , \*\*,  $p < 0.01$ , \*\*\*,  $p < 0.001$ . ELISA data are presented as bar chart ( $n = 3$ ); qPCR results are presented as bar chart ( $n = 3$ ).

**Figure 3**

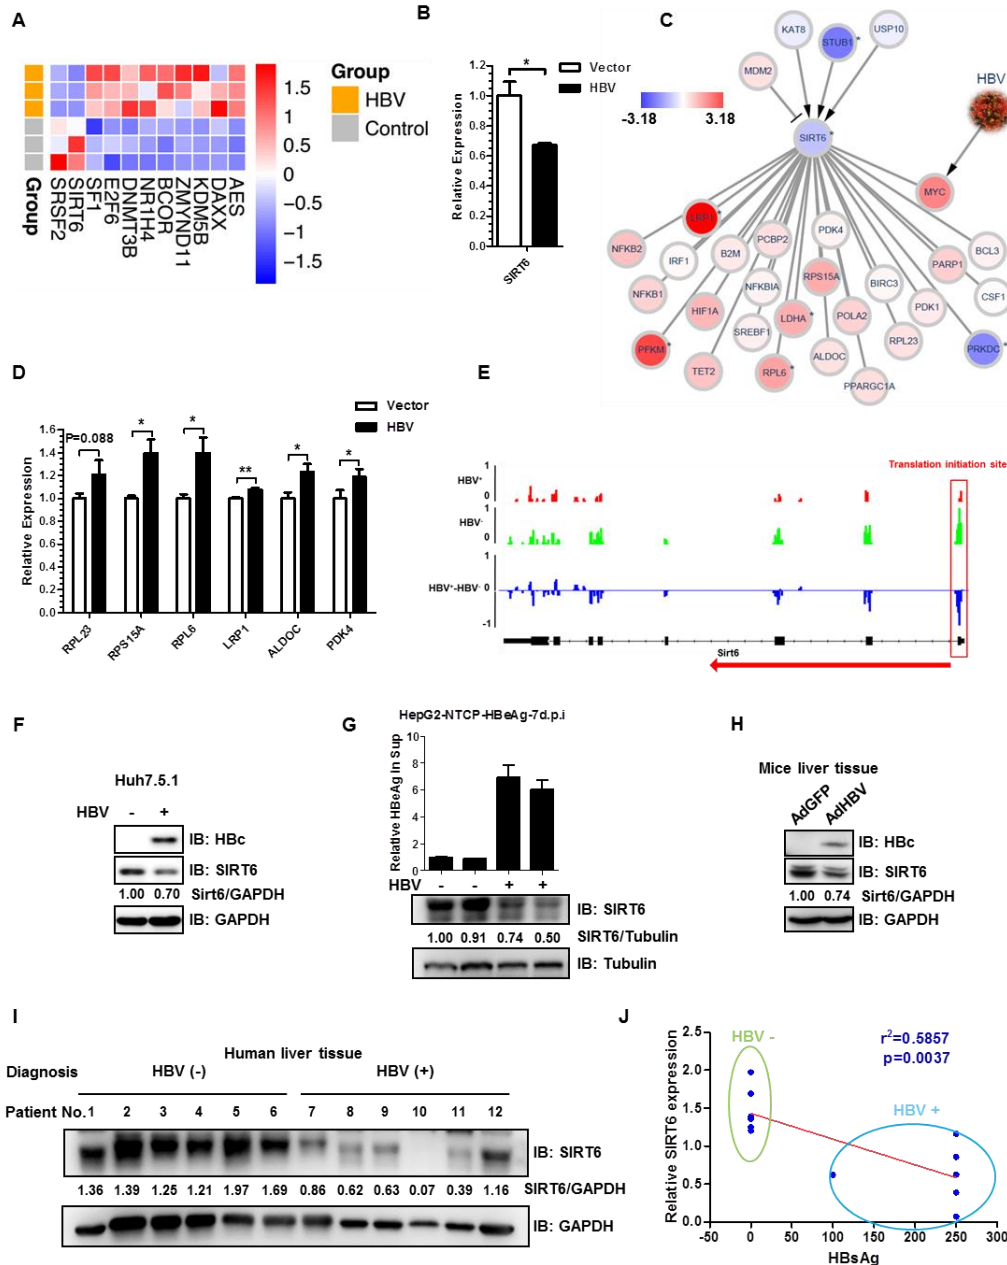

**Figure 3: HBV induced transcriptional changes in host cells with SIRT6 emerged as a potential host virus-restricting factor.** (A) RNA-sequencing was conducted with Huh7.5.1 cells transfected with Vector (Control) or pcccdNA and pCMV-Cre. Heatmap of 11 transcriptional DEGs, which have transcription corepressor activity, three biological

replicates were shown for HBV and control group. **(B)** RT-qPCR confirmed that HBV down-regulated the transcriptional level of endogenous *SIRT6* transcription. **(C)** Network analysis of *SIRT6*-associated genes whose transcription was altered by HBV. Red and blue nodes indicate the up- and down-regulated genes, respectively. The color intensity indicates the fold change level of the gene. Nodes with \* are DEGs ( $P\text{-adjust} < 0.05$ ,  $|\log_2FC| \geq 1$ , also see methods). **(D)** RT-qPCR validation of some of the *SIRT6*-associated genes that were shown in C. **(E)** Representative profiles of ribosome footprints of human *SIRT6* ORF upon HBV, translation initiation of endogenous *SIRT6* was down-regulated by HBV in Huh7.5.1 cells. **(F)** Endogenous *SIRT6* was down-regulated by HBV in Huh7.5.1 cells. **(G)** *De novo* infection of HBV down-regulated endogenous *SIRT6* level in HepG2-NTCP cells, HepG2 cells stably expressing NTCP (sodium taurocholate cotransporting polypeptide), the functional receptor of HBV. The results of two independent biological replicates were shown. **(H)** HBV down-regulated *SIRT6* in mouse livers infected with adenovirus harboring HBV genome. **(I)** Total proteins were extracted from the normal liver tissues of 12 patients who were diagnosed with HBV positive and negative, respectively. For patient information see **Table S1**. Endogenous *SIRT6* or GAPDH proteins were visualized with IB using anti-*SIRT6* or anti-GAPDH, with their relative abundances calculated using ImageJ. **(J)** The reverse correlation between the serum levels of HBsAg and the relative abundances of endogenous *SIRT6* protein in liver tissues of the 12 patients. \*,  $p < 0.05$ , \*\*,  $p < 0.01$ , \*\*\*,  $p < 0.001$ . qPCR results are presented as bar chart (For *SIRT6*,  $n=2$ ; for other genes,  $n = 3$ ); ELISA data are presented as bar chart ( $n = 3$ ).

**Figure 4**

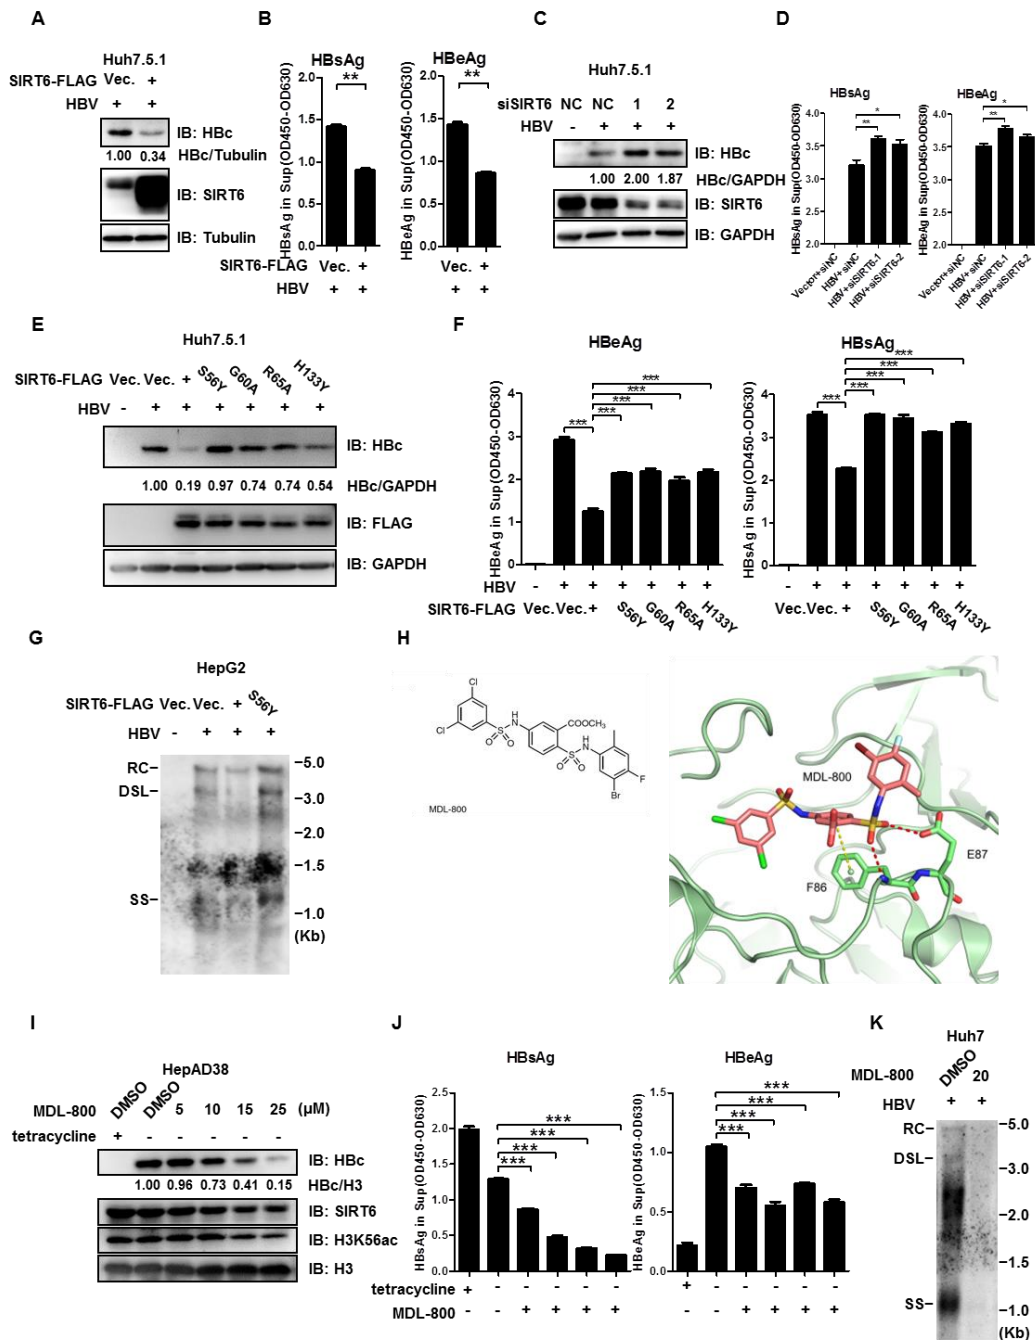

**Figure 4: Identification of SIRT6 as a host virus-restricting factor for HBV.**

(A and B) Introduction of Sirt6 suppressed the expression of HBc (A) and HBs and HBe (B) antigens in Huh7.5.1 cells. (C and D) Knocking-down endogenous Sirt6 promoted the expression of HBc (C) and HBs and HBe (D) antigens in Huh7.5.1 cells. (E and F) Effect of SIRT6 enzymatic mutants on HBc (E) and HBs and HBe (F) expression in huh7.5.1 cells. (G) The effect of SIRT6 wild type or enzymatic deficient mutant on HBV genome replication was measured via southern blotting in HepG2

cells. **(H)** The chemical formula and a close-up view of MDL-800 in complex with 2'-O-acyl-ADP ribose (2'-O-acyl-ADPR) motif of human SIRT6 (X-ray structure, PDB number 5Y2F). ELISA shows that MDL800 suppressed the expression of HBc **(I)** and HBs and HBe **(J)** antigens in dose-dependent manner in Tet- controlled HBV in HepAD38 cells. **(K)** MDL-800 treatment significantly suppressed HBV genome replication intermediates in Huh7 cells. RC, relaxed circular DNA; DSL, double strand linear DNA; SS, single strand DNA. For ELISA, for panel B, n=2; For others, n=3. \*, p<0.05, \*\*, p<0.01, \*\*\*, p<0.001.



**Figure 5**

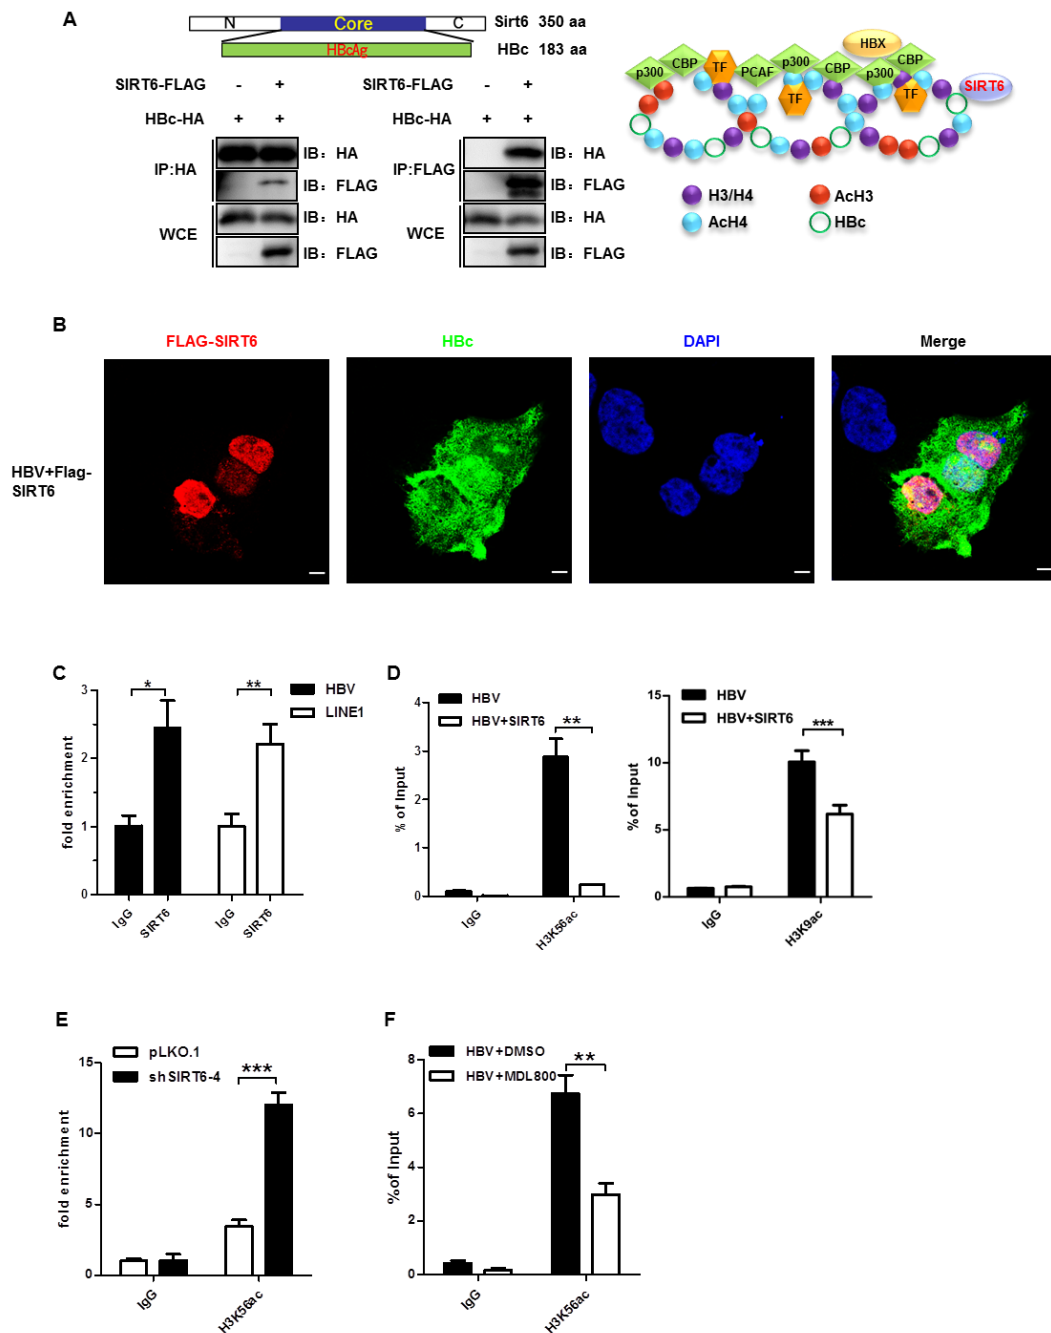

**Figure 5: SIRT6 restricts HBV gene expression through deacetylating H3K9ac and H3K56ac on HBV mini-chromosome.** (A) SIRT6 co-immunoprecipitated with HBcAg in 293FT cells. (B) SIRT6 and HBcAg co-localized in the nuclei of Huh7.5.1 cells during HBV replication. Scale bars, 20  $\mu$ m. ChIP assays were performed using indicated antibodies with cells upon either HBV transfection alone (C), or in combination with SIRT6 overexpression (D) or knockdown (E) or MDL800 treatment

(F). \*,  $p < 0.05$ , \*\*,  $p < 0.01$ , \*\*\*,  $p < 0.001$ . ChIP data were acquired in Huh7.5.1 cells and were presented as bar chart (n=3 per group).

**Figure 6**

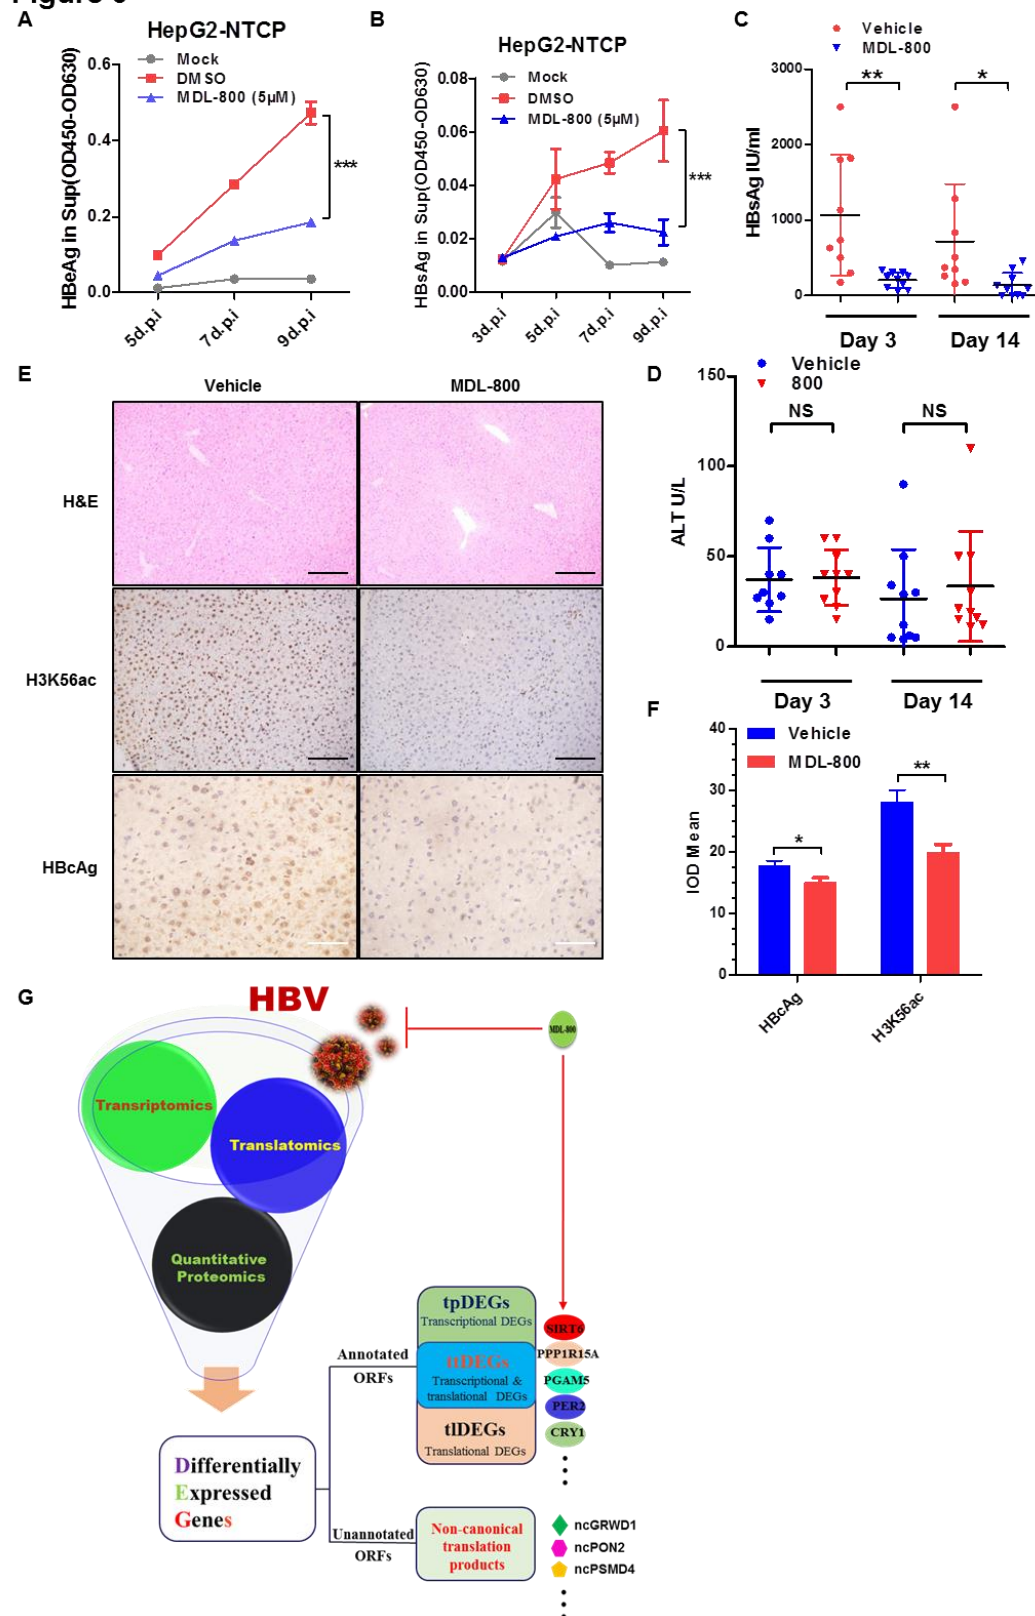

**Figure 6: MDL-800 restricts HBV *in vitro* and *in vivo*.** (A and B) HepG2-NTCP cells were infected either with vehicle (mock) or HBV particles purified from the culture medium of HepAD38 cells, the HBV groups were treated with DMSO or MDL800, and the HBeAg (A) and HBsAg (B) level in culture medium of each group were collected and measured at indicated time points. (C) A Mouse model for HBV infection was established as previously described<sup>25</sup>. Peripheral blood samples were collected and subjected to ELISA to detect serum HBsAg, for vehicle group and MDL800 group. (D) Peripheral blood samples of mice treated with MDL800 or vehicle were collected and subjected to Alanine-Aminotransferase (ALT) assay. (E) HE or immunohistochemistry staining of liver sections from mice receiving vehicle or MD800 from experiment in F. Representative images of indicated group were shown. For the panel labeled H&E and H3K56ac, Scale bars, 200  $\mu\text{m}$ ; For the panel labeled HBcAg, Scale bars, 100  $\mu\text{m}$ . (F) Statistics analysis of IHC results of indicated group, the mean integral optical density (IOD mean) of five random visual fields for each sample (n=9 for vehicle group and n=10 for MDL800 group) was measured. (G) Summary of the major findings in this study. Multi-omics interrogation into HBV-host interaction has led to the discovery of multiple HBV-induced DEGs including canonical and non-canonical genes in host cells. For panel A and B, two-way ANOVA test was used, for others, student t test was used. \*, p<0.05, \*\*, p<0.01, \*\*\*, p<0.001.

1

2 **Supplementary figures**

3

**Figure S1**

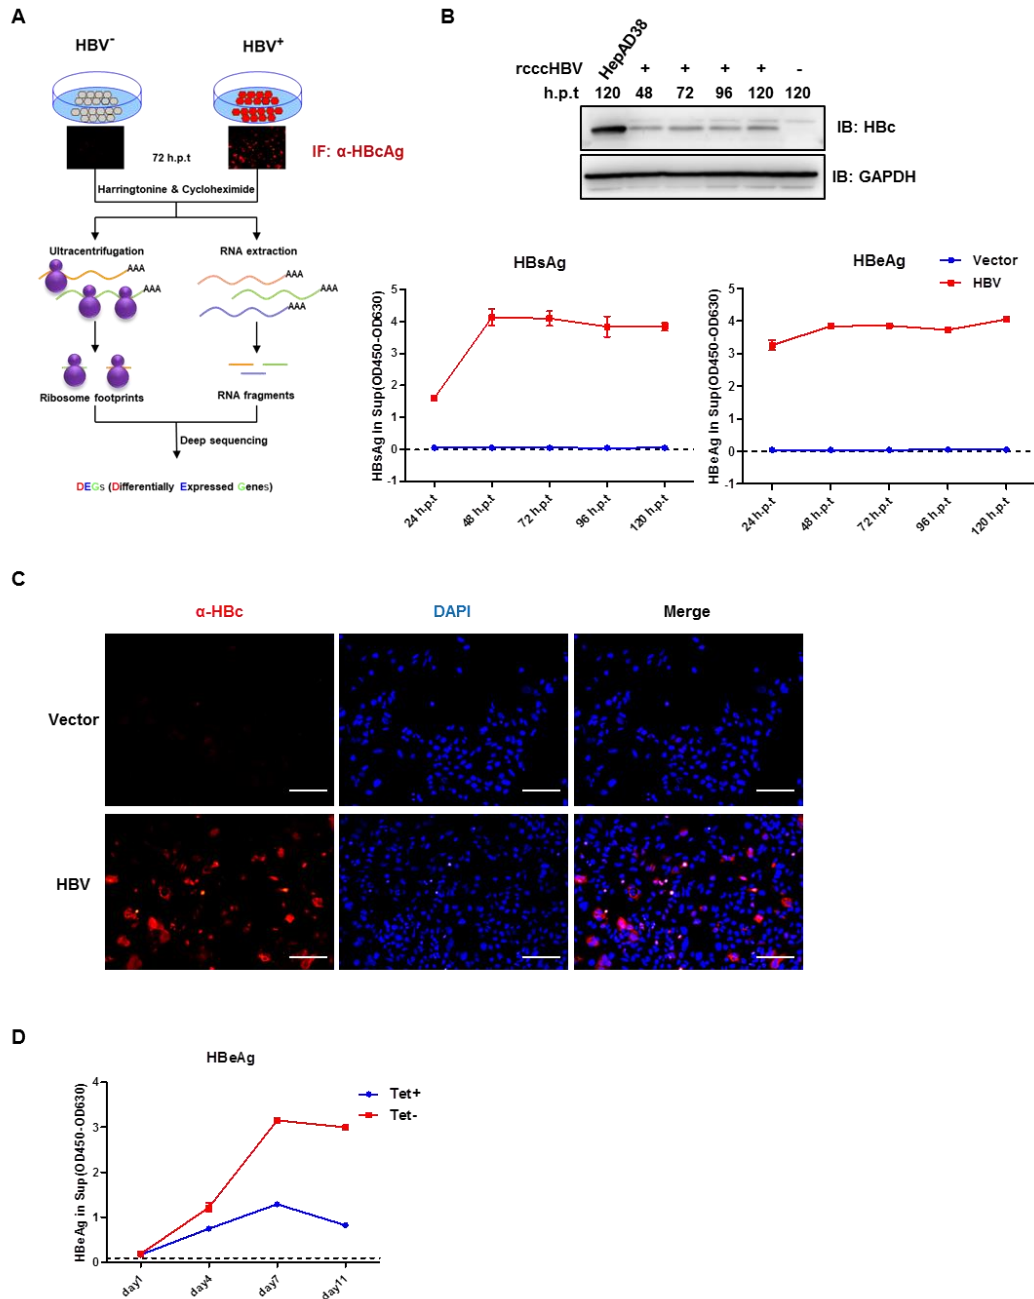

4

5 **Figure S1: Replication kinetics of recombinant cccDNA system of hepatitis B**  
 6 **virus.** Huh7.5.1 cells were transfected with HBV recombinant cccDNA system  
 7 (rccHBV) or vector plus pCMV-Cre.

8 profiling of host genes upon transfection with the Cre-based rcccDNA system of  
9 HBV. **(B)** Cells were harvested at sequential time points as indicated, and lysates of  
10 HepAD38 cells which have been cultured for 120 hours after tetracycline withdraw  
11 was used as a positive control. h.p.t: hour post transfection. Culture medium in vector  
12 or HBV group was harvested and supernatants collected at sequential time points as  
13 indicated were subjected to ELISA (n=2). **(C)** Cells were subjected to  
14 immunofluorescence assay at 72 h.p.t. using anti-HBcAg (Dako, B0586, red) and  
15 nuclei stained by DAPI (blue). Scale bars, 100  $\mu$ m. **(D)** The expression of HBeAg  
16 secreted from HepAD38 cells chromosomally integrated with the Tet-inducible HBV  
17 expression system at indicated time points after tetracycline withdraw was accessed  
18 by ELISA (n=2).  
19

## Figure S2

A

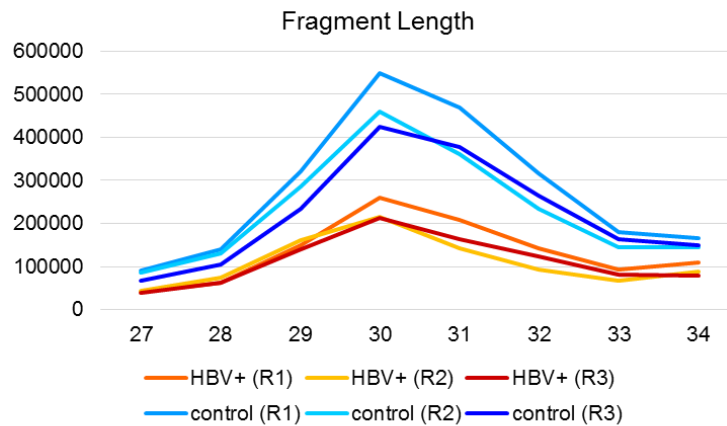

B

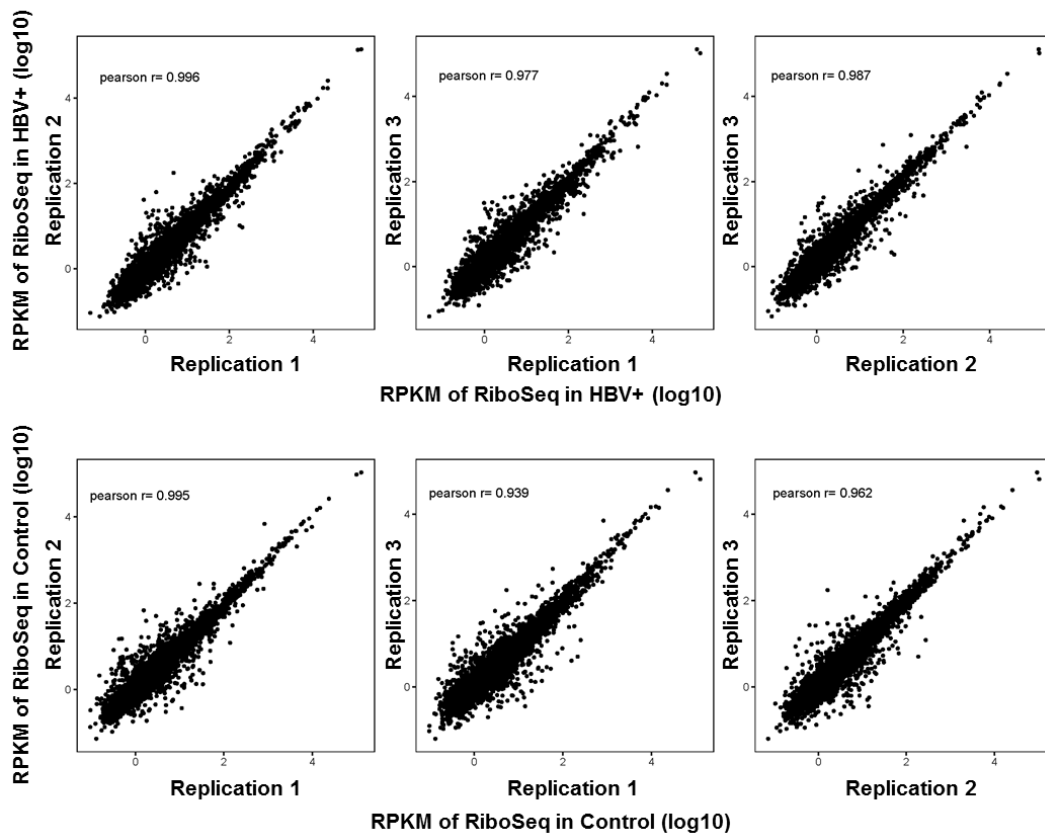

20

21 **Figure S2: The length distribution of ribosome footprints and reproducibility of**  
22 **ribosome profiling experiments.** (A) Control R1-3, replicate 1-3 in control group;  
23 HBV+ R1-3, HBV group replicates 1-3. X axis, the length distribution of ribosome  
24 footprint length in nucleotide (nt); Y axis, the reads numbers. (B) Plots show the  
25 correlations of RiboSeq RPKMs between three biological replicates in either HBV or  
26 non-HBV groups. Only mRNAs matched with > 5reads were counted.

27

Figure S3

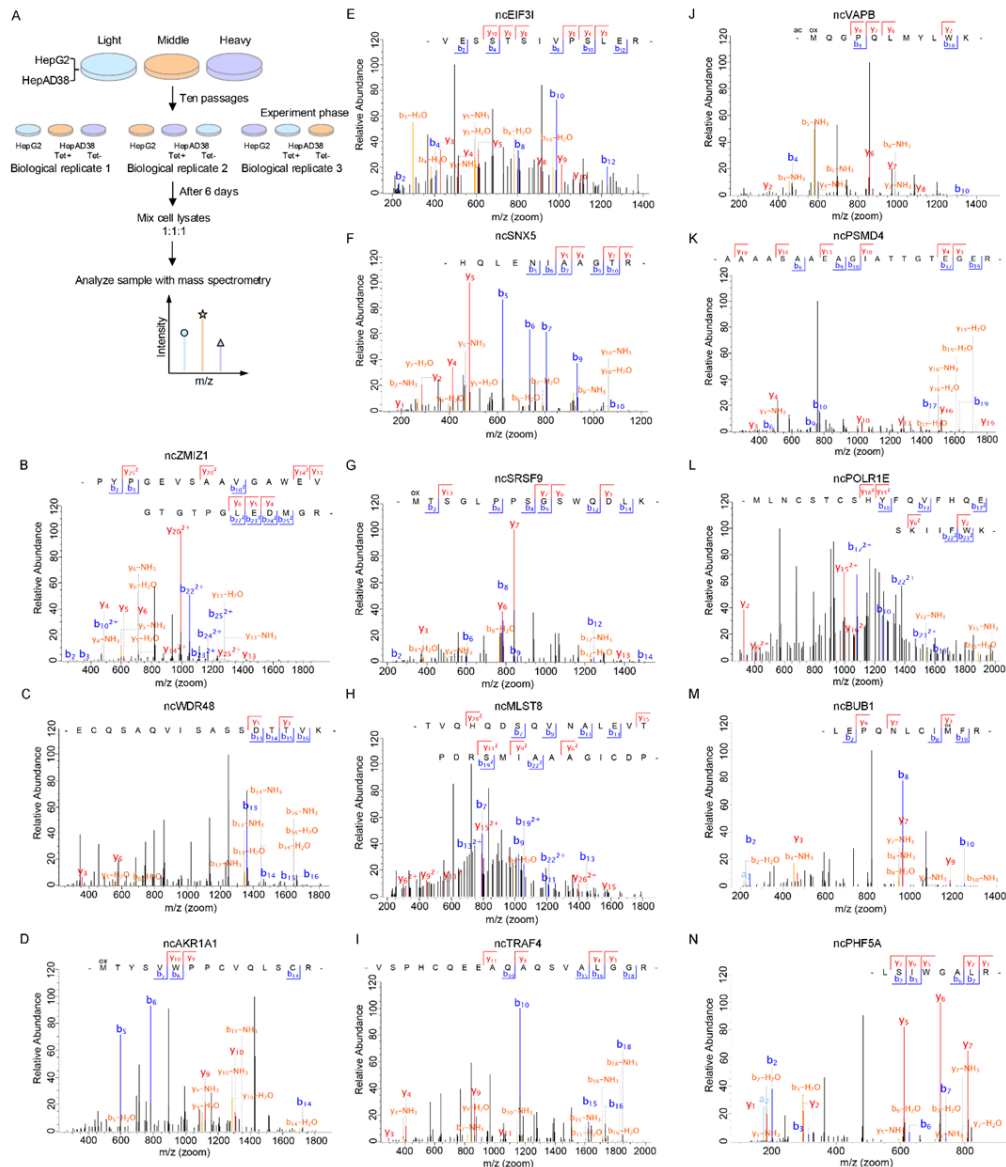

28

29 **Figure S3: SILAC identified 13 peptides produced from non-canonical ORFs.**  
 30 (A) Three biological replicates were produced by labeling cells with different  
 31 combination of light, middle and heavy stable isotopes, after experimental phase, cell  
 32 lysates of each replicates were mixed by 1:1:1 and subjected to mass spectrometry  
 33 (See online methods for more details). (B-N) MS spectra of identified peptide with  
 34 sequence uniquely matched to the translated products of the non-canonical ORFs  
 35 discovered in our ribosome profiling assays. These non-canonical ORFs were never  
 36 annotated before and could have sequences and functions totally unrelated to any  
 37 known proteins. They were nevertheless named after the closest annotated ORF in



38 human genome. Matched y-ions and b-ions were shown in red and blue, respectively;  
 39 the modified ions are shown in orange.  
 40

**Figure S4**

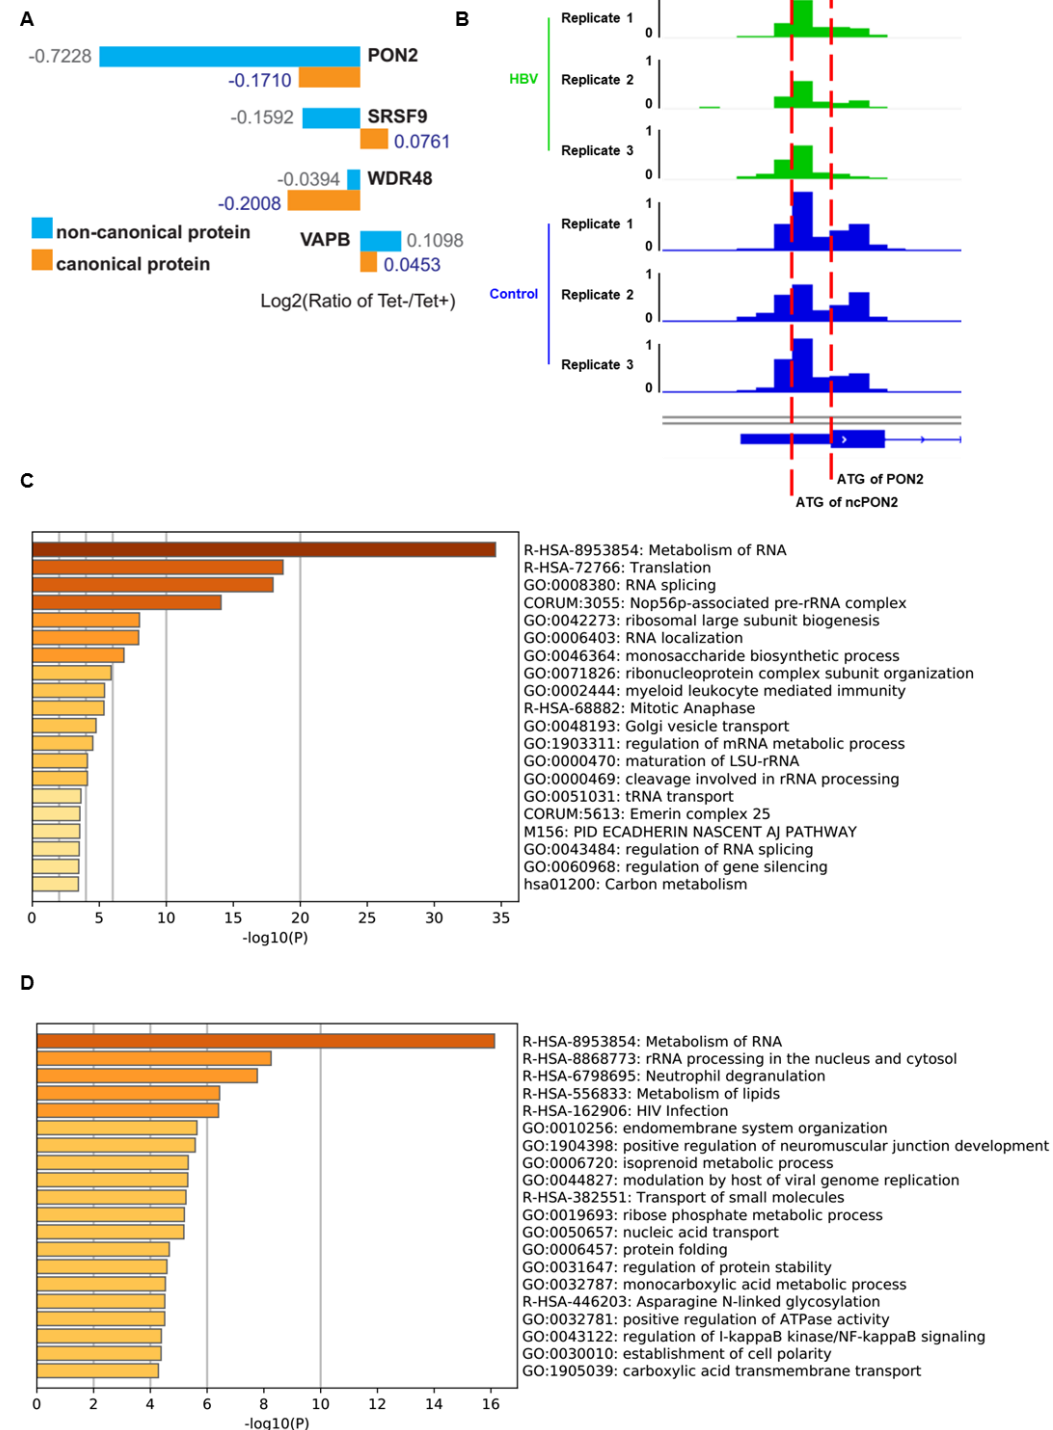

41  
 42 **Figure S4: Analysis on ncPON2 and ncGRWD1.**(A) The SILAC ratio of  
 43 representative novel peptides and the corresponding canonical proteins in  
 44 HBV+/HBV-, also see **Supplementary file S3 and S10.** (B)The IGV screen shot of

45 RiboSeq pattern around the N-terminal region of *PON2* in all three biological  
46 replicates in either HBV or non-HBV groups. (C and D) To analyze the two HBV  
47 suppressive ncORFs, co-immunoprecipitation coupled with mass spectrometry  
48 analysis was performed with ncGRWD1-FLAG and ncPON2-FLAG, with  
49 pCDNA3.0-FLAG as a negative control. And GO and pathway enrichment analysis  
50 was performed using a web server Metascape (<http://metascape.org/>) with the  
51 identified interactors of ncGRWD1 (C) or ncPON2 (D) (also see **Supplementary file**  
52 **S4**).

**Figure S5**

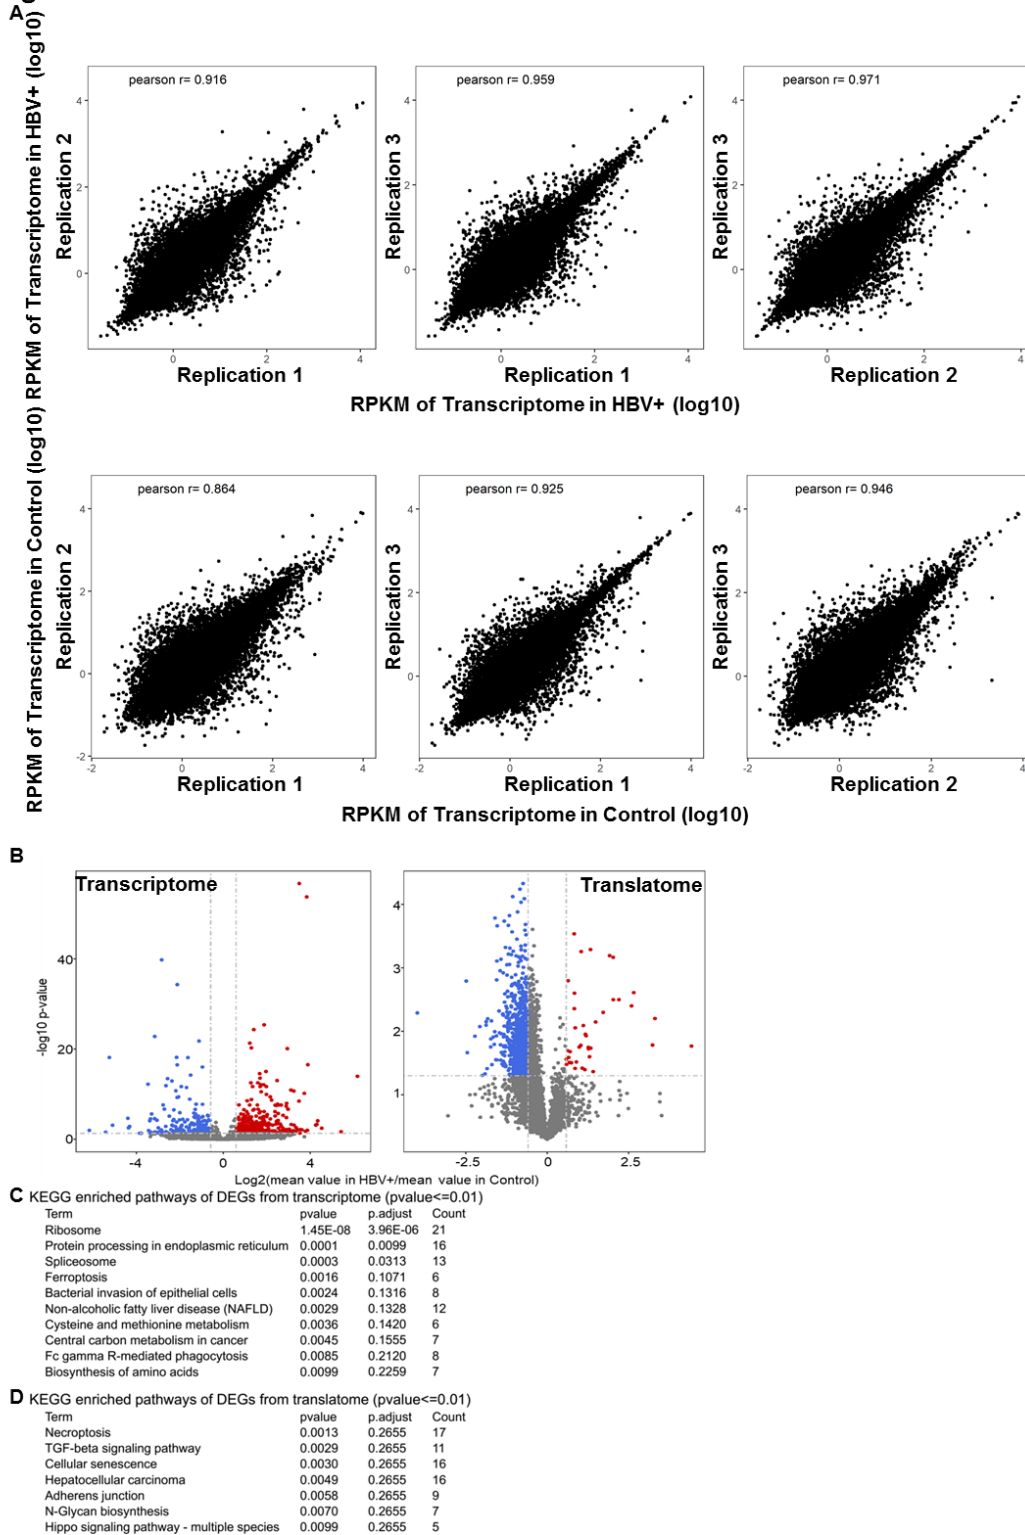

53

54 **Figure S5: Reproducibility assay, volcano plot and KEGG pathway analysis of**  
 55 **RNA-seq and ribosome profiling experiments.** (A) Plots show the correlations of  
 56 RNA-seq RPKMs between three biological replicates in either HBV or non-HBV  
 57 groups. Only mRNA matched with > 64 reads were counted. (B) Differentially

58 expressed genes (DEGs) in transcriptome and translome were depicted as volcano  
 59 plot, with *p*-value and fold change both shown; up-regulated and down-regulated  
 60 genes were depicted as red and blue, respectively. (C, D) KEGG pathway enrichment  
 61 analysis of genes differentially transcribed (C) or translated (D) in HBV-loaded cells  
 62 versus control cells.

63

Figure S6

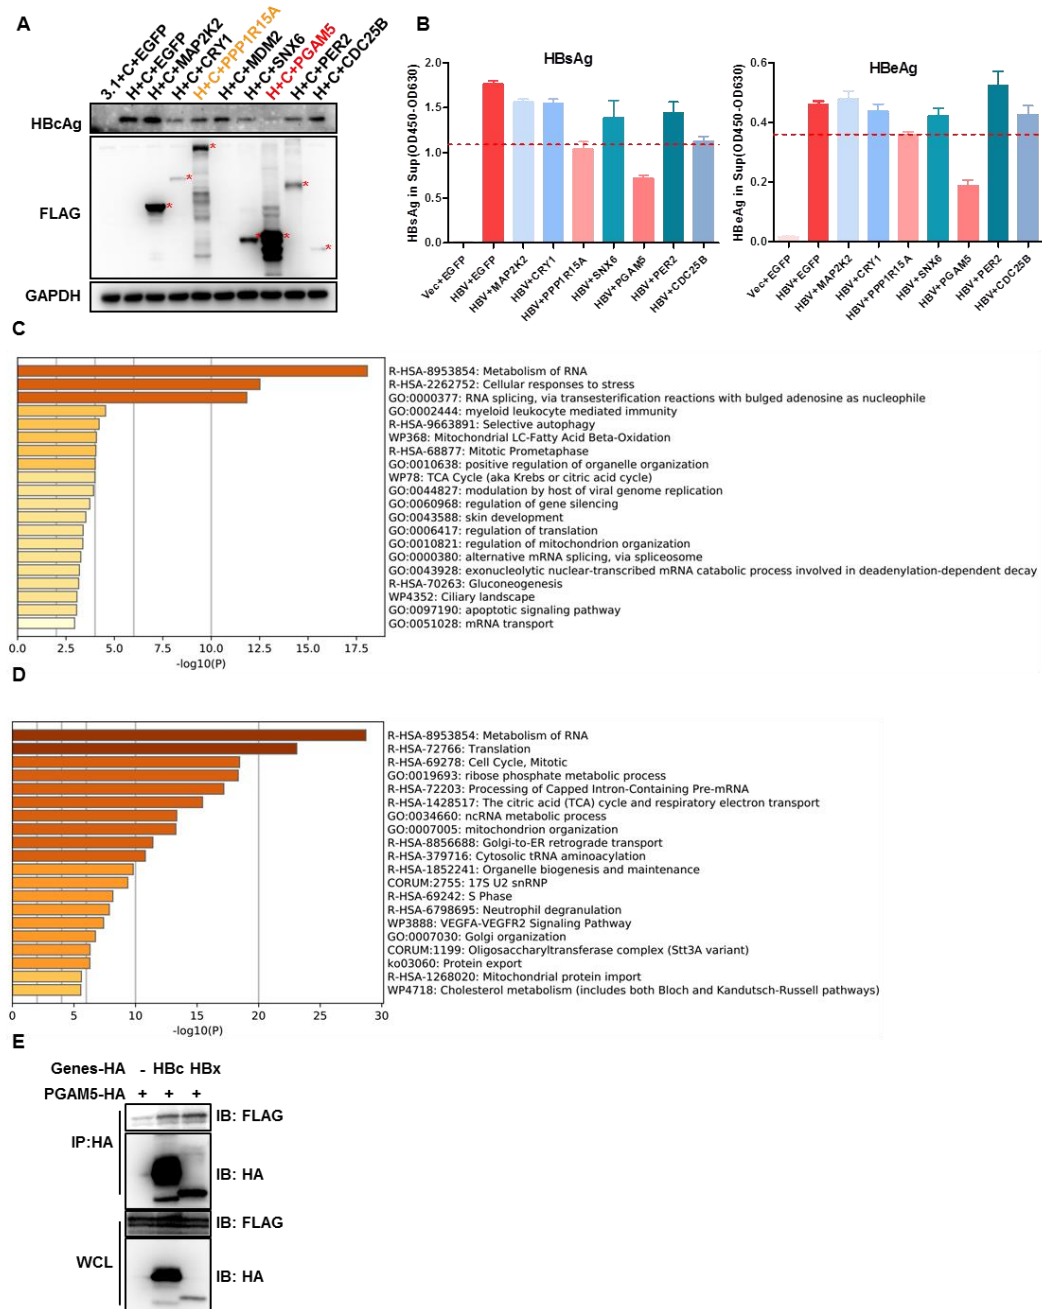

64

65 **Figure S6: Screen and analysis on transcriptional and translational DEGs. (A)**

66 We tested the plasmids we have of the 35 transcriptional and translational DEGs as  
67 well as MDM2 in recombinant cccDNA system. Please note that we failed in  
68 detecting MDM2. (C and D) To further analysis the mechanism of the suppressive  
69 effect of PPP1R15A and PGAM5 on HBV, co-immunoprecipitation coupled with  
70 mass spectrometry analysis was performed with empty vector as a negative control to  
71 identify deemed interactions between host proteins and PPP1R15A or PGAM5, and  
72 GO and pathway enrichment analysis was performed using a web server Metascape  
73 (<http://metascape.org/>) with the identified interactors of PPP1R15A (C) or PGAM5  
74 (D), also see **Supplementary file S9**. (E) We performed co-immunoprecipitation  
75 between PGAM5 and two proteins which were essential for virus replication, HBc  
76 and HBx.  
77

**Figure S7**

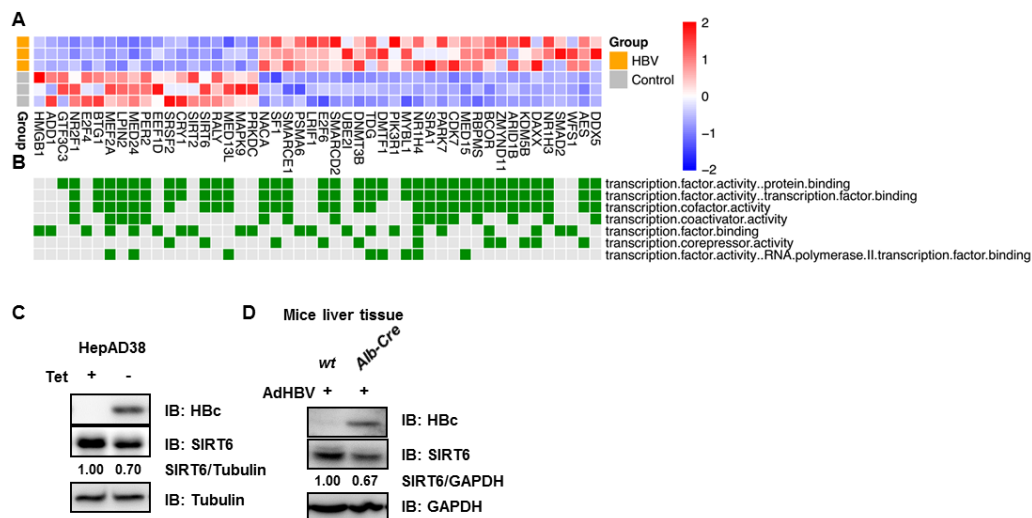

78  
79 **Figure S7: HBV down-regulates SIRT6 in HepAD38 cells and mouse model.** (A)  
80 Heatmap of DEGs from RNA-seq in transcription molecular function. (B) The  
81 heatmap of DEGs participate in the indicated GO term. (C) HepAD38 cells with or  
82 without removal of tetracycline for 5 days were harvested, and lysates were subjected  
83 to IB analyses using indicated antibodies. (D) 14 days after recombinant adenovirus  
84 harboring HBV prcccDNA was injected into wild type or *Alb-Cre* transgenic mice,  
85 total proteins from the mouse liver tissues in each group were extracted and subjected  
86 to IB analyses using indicated antibodies.

87

## Figure S8

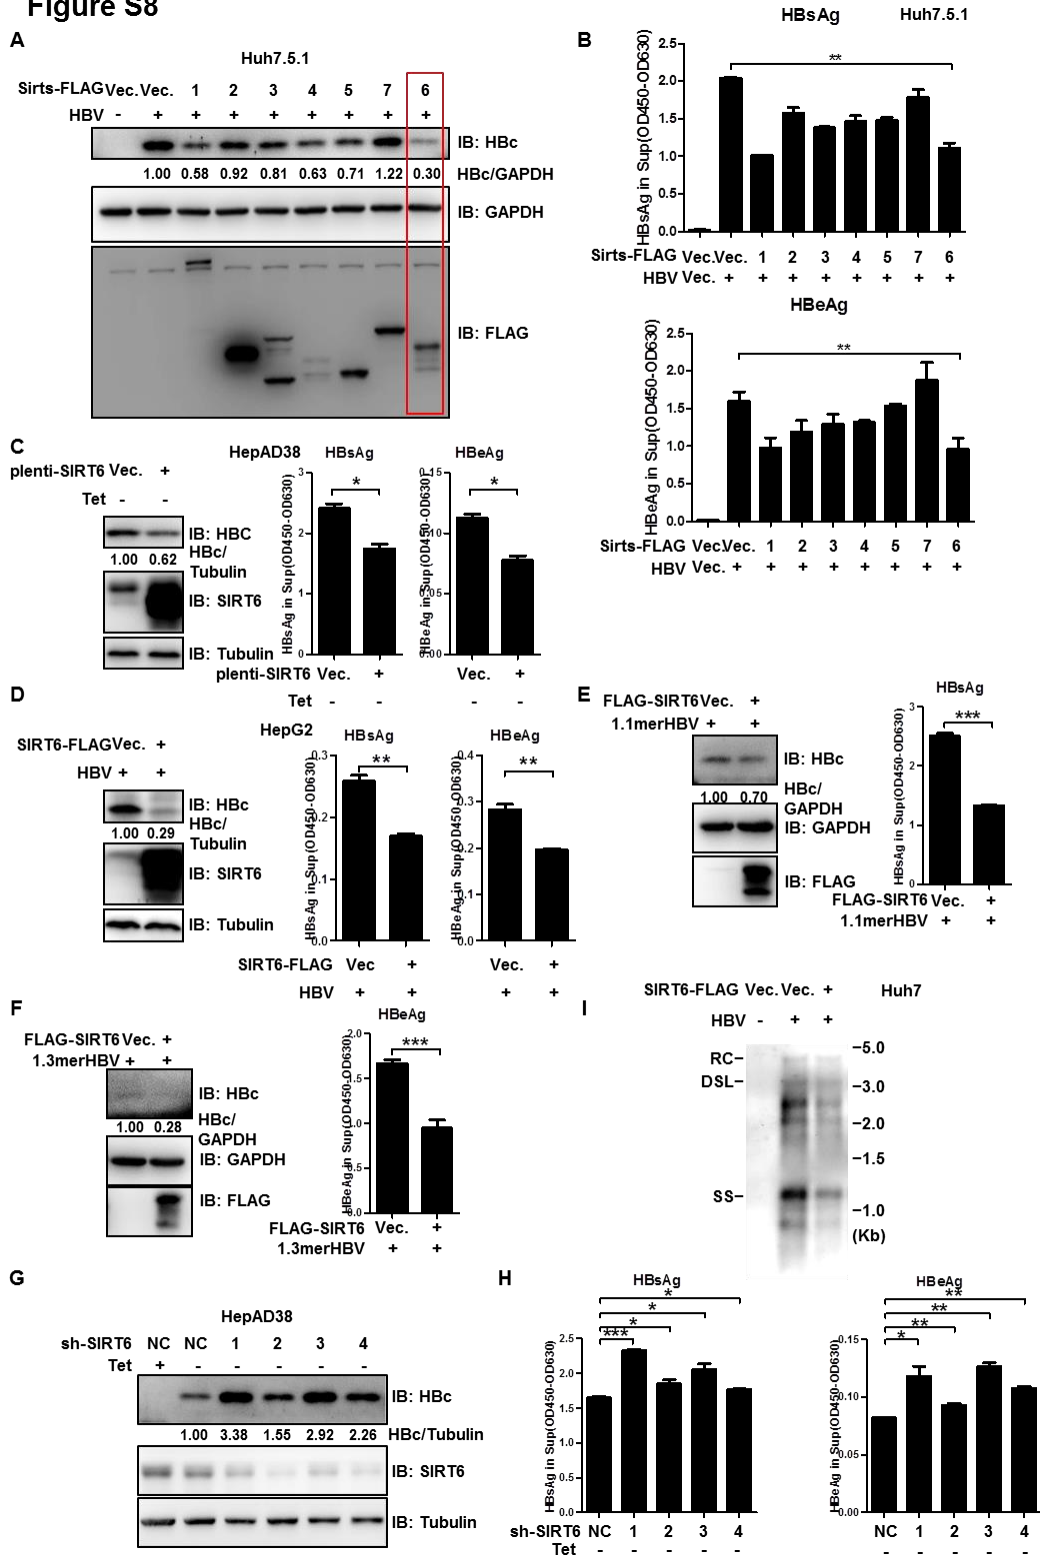

88

89 **Figure S8: HBV down-regulates SIRT6 reciprocally in multiple HBV replication**  
 90 **systems. (A and B)The cDNA of sirtuins-family were each co-transfected with HBV**  
 91 **system into Huh7.5.1 cells and the protein levels of HBc, GAPDH and SIRTUINS**

92 were detected using indicated antibodies (A). The HBsAg and HBeAg level in  
93 supernatants were measured by ELISA. (B). (C) HepAD38 cells chromosomally  
94 integrated with the Tet-controlled HBV expression system were infected with lenti-  
95 virus vector expressing SIRT6, Cells were harvested and lysates subjected to IB using  
96 the indicated antibodies, while the supernatants from the cell culture were collected  
97 and subjected to ELISA using anti-HBsAg or anti-HBeAg. (D) HepG2 cells were co-  
98 transfected with HBV cccDNA system (H+C, prCCCDNA and pCMV-Cre) and  
99 pCDNA3.0-Sirt6-FLAG or pCDNA3.0 using Polyetherimide . Cells were harvested  
100 72 h.p.t., with lysates collected and subjected to IB analyses using the indicated  
101 antibodies. The HBsAg and HBeAg in supernatants were determined by ELISA. (E  
102 and F) Experiments similar to those in D were performed with Huh7.5.1 cells  
103 transfected with 1.1mer- (E) or 1.3mer- (F) HBV linear genomes, For ELISA, n=3.  
104 (G) HepAD38 cells were transduced with lenti-virus vector (NC) or those encoding  
105 shRNAs that targeted endogenous SIRT6 (shSIRT6 1,2,3,4), After tetracyclin  
106 withdrawn for 4 days. HBcAg was measured using western blot, and (H) the level of  
107 HBsAg and HBeAg in supernatants was determined by ELISA. (I) The effect of  
108 SIRT6 on HBV genome replication was measured via southern blotting in Huh7 cells.  
109 RC, relaxed circular DNA; DSL, double strand linear DNA; SS, single strand DNA.  
110 \*, p<0.05, \*\*, p<0.01, \*\*\*, p<0.001.

111

## Figure S9

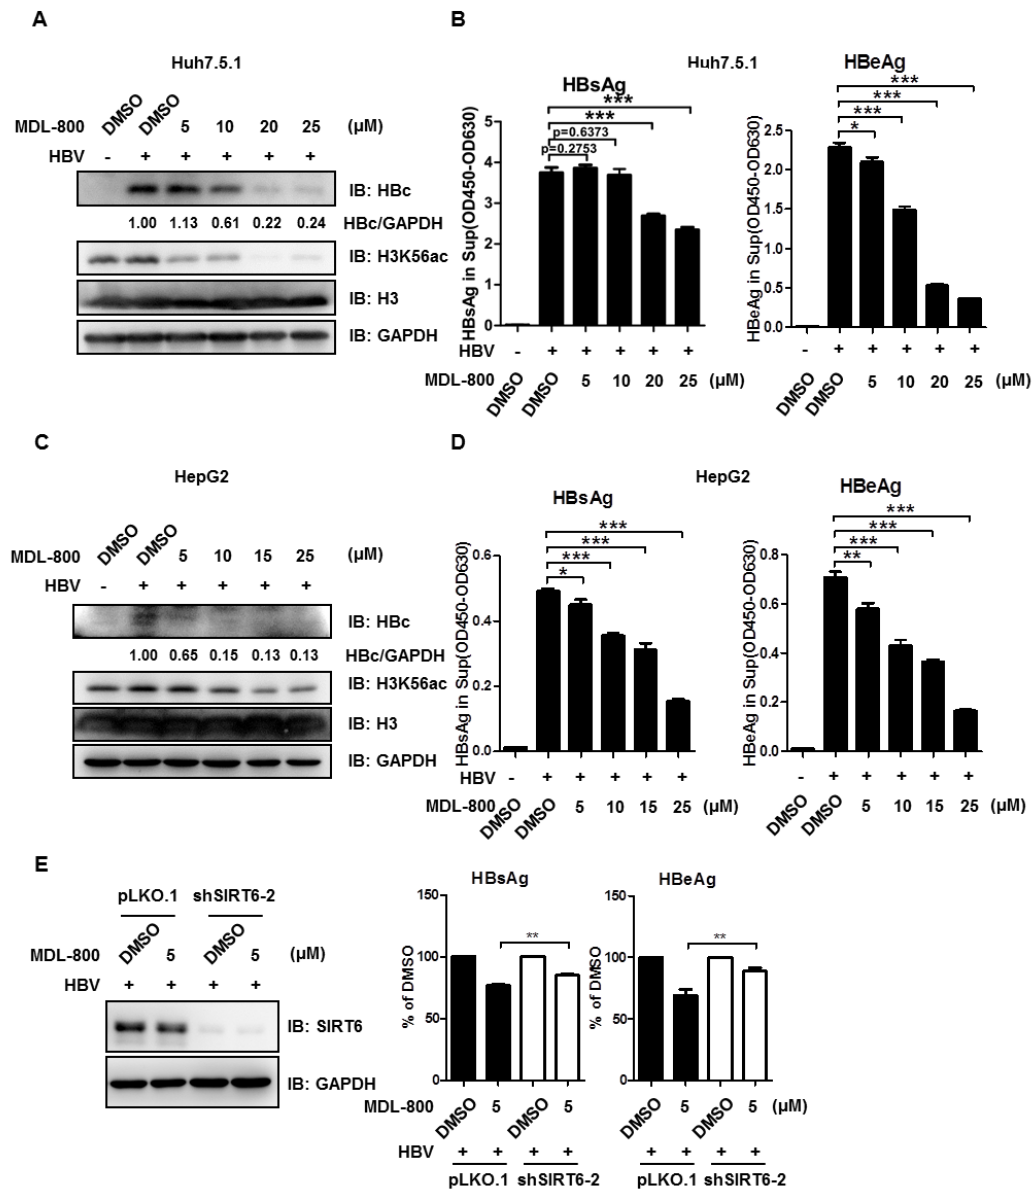

112

113 **Figure S9: MDL-800 suppresses HBV gene expression in multiple cells.** (A-D)  
 114 Huh7.5.1 (A, B) or HepG2(C, D) cells were treated with increasing doses of MDL-  
 115 800 after HBV transfection, the endogenous proteins were visualized with the  
 116 indicated antibodies, while the levels of HBsAg or HBeAg in supernatants of cell  
 117 cultures were determined with ELISA using anti-HBsAg or anti-HBeAg, n=3 for each  
 118 group. (E) The effectiveness of MDL800 on HBV was tested in SIRT6 knock-down  
 119 cell line or control cell line. For ELISA, n=3. \*, p<0.05, \*\*, p<0.01, \*\*\*, p<0.001.

120

121



## Figure S10

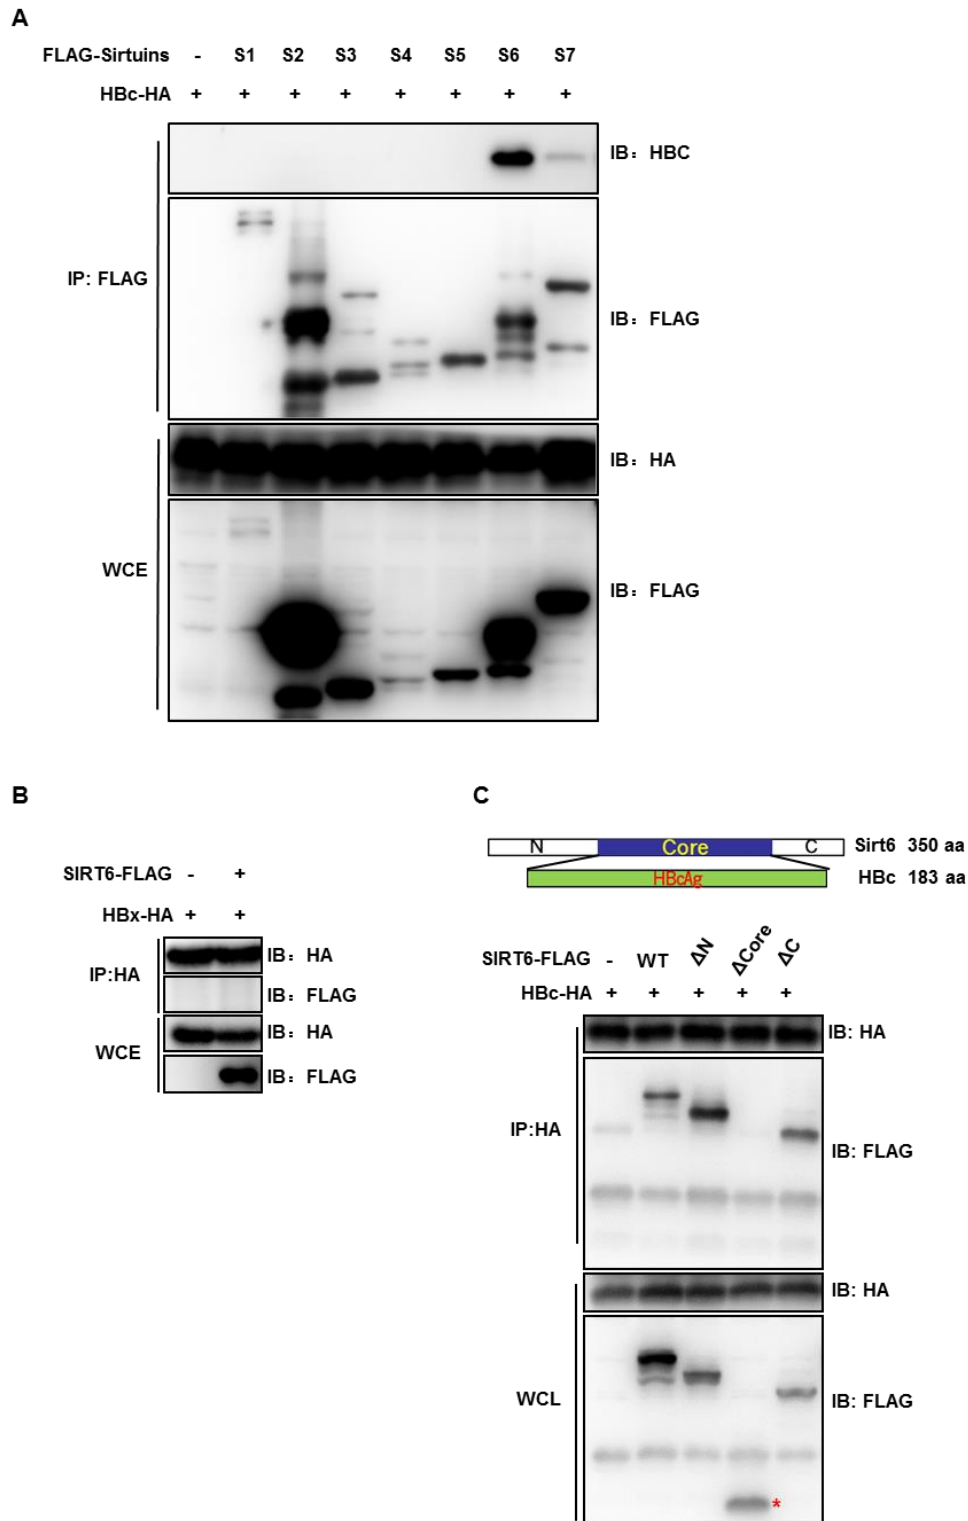

122

123 **Figure S10: The interaction between SIRT6 and HBc.** (A) HEK293T cells were  
 124 transfected with HA-tagged HBc and FLAG-tagged Sirtuins family proteins, and co-

125 immunoprecipitation was performed using anti-FLAG beads. (B and C) HEK293T  
 126 cells were transfected with plasmids encoding HA-tagged HBx and FLAG-tagged  
 127 SIRT6, with cells harvested at 48 h.p.t (hours post transfection), and lysates were  
 128 subjected to Co-immunoprecipitation (Co-IP) followed by IB with indicated  
 129 antibodies. (B) SIRT6 did not interact with HBx. (C) 293T cells were co-transfected  
 130 with plasmids encoding HA tagged HBc and FLAG-tagged full-length SIRT6 or the  
 131 indicated fragments, after 48 hours, Co-immunoprecipitation (Co-IP) was performed.  
 132  $\Delta$ N, SIRT6 deleted the N terminal domain (1-48Aa);  $\Delta$ C, SIRT6 deleted the C  
 133 terminal domain (272-328Aa),  $\Delta$ Core, SIRT6 with the catalytic core domain (49-271  
 134 Aa) deleted. WCE: whole cell extracts. WCL: whole cell lysates.

135

136

**Table S1. Patient information in figure 3I and 3J.**

| Patient Number | Clinical Diagnosis               | Age | Gender | HBV DNA (copy/ml) | HBsAg (IU/ml) | Anti-HBs(mIU/ml) | HBeAg (S/CO) | Anti-HBe(S/CO) | Anti-HBc (S/CO) |
|----------------|----------------------------------|-----|--------|-------------------|---------------|------------------|--------------|----------------|-----------------|
| 1              | Primary Liver Cancer Without HBV | 61  | Male   | <50               | 0.01          | 0.01             | 0.35         | 0.08           | 0.5             |
| 2              | Liver Cirrhosis Without HBV      | 58  | Male   | NA                | 0             | 108.94           | 0.28         | 0.34           | 7.38            |
| 3              | Liver Cirrhosis Without HBV      | 48  | Male   | NA                | 0.03          | 0.69             | 0.26         | 0.03           | 9.23            |
| 4              | Liver Cirrhosis Without HBV      | 71  | Male   | NA                | 0             | 3.54             | 0.33         | 1.42           | 7.92            |
| 5              | Donor of Liver Transplantation   | NA  | NA     | 0                 | 0             | NA               | 0            | NA             | NA              |
| 6              | Donor of Liver Transplantation   | NA  | NA     | 0                 | 0             | NA               | 0            | NA             | NA              |
| 7              | Primary Liver Cancer With HBV    | 54  | Male   | NA                | 250           | 0.22             | 0.37         | 0.17           | 8.24            |
| 8              | Primary Liver Cancer With HBV    | 66  | Male   | <50               | 99.78         | 0.01             | 0.273        | 0.04           | 9.74            |
| 9              | Primary Liver Cancer With HBV    | 51  | Male   | <50               | 250           | 0.32             | 0.561        | 1.01           | 11.04           |
| 10             | Primary Liver Cancer With HBV    | 53  | Male   | 14500             | 250           | 0.06             | 0.294        | 0.01           | 11.79           |
| 11             | Primary Liver Cancer With HBV    | 42  | Male   | 8620              | 250           | <0.01            | 0.899        | 0.92           | 9.92            |
| 12             | Primary Liver Cancer With HBV    | 46  | Male   | 5990              | 250           | <0.01            | 0.335        | 0.01           | 12.02           |

Footnote: Patient 2-7 were diagnosed at Ruijin Hospital, others were diagnosed at Eastern Hepatobiliary Surgery Hospital. NA, Not Available; IU, International Unit; S/CO, Sample Optical Density / Cut-off Value.

137

138 **Table S1: Patient information in this study.** Five most widely used HBV test for  
 139 HBsAg, HBsAb, HBeAg, HBeAb and HBcAb were determined at indicated hospital.  
 140 HBV DNA copy number in some patient serum was also measured. Note that patient  
 141 5 and 6 were donors of liver transplantation and tested for HBV free.

142

143 **Data File S1. FPKM of ribosome profiling.**

144 **Data File S2. Ribocode analysis.**

145 **Data File S3. Novel peptides.**

146 **Data File S4. ncGRWD1 ncPON2 interactor.**

147 **Data File S5. FPKM of RNAseq.**

148 **Data File S6. DEGs list of RNAseq.**

- 149 **Data File S7. DEGs list of ribosome profiling.**
- 150 **Data File S8. Translation\_efficiency.**
- 151 **Data File S9. PPP1R15A PGAM5 interactor.**
- 152 **Data File S10. proteome.**
- 153 **Data File S11. List of resources used in this study.**
- 154
- 155
